# Supplementary material
Source: PubMed Central journal article supplement (PMC5844831)
Supplement: NIHMS925484-supplement.pdf [file NIHMS925484-supplement.pdf]

| Identified Proteins                                                                    | Location                          | Length | Accession Number | Molecular Weight | Spectra count | Isolate  |
|----------------------------------------------------------------------------------------|-----------------------------------|--------|------------------|------------------|---------------|----------|
| 14-3-3 protein                                                                         | TGVEG_chrVIIb:818668-821299(+)    | 323    | TGVEG_263090     | 37 kDa           | 13            | NR-20731 |
| 14-3-3 protein                                                                         | TGME49_chrVIIb:813151-815788(+)   | 323    | TGME49_263090    | 37 kDa           | 8             | NR-362   |
| 2-C-methyl-D-erythritol 2,4-cyclodiphosphate synthase domain-containing protein        | TGME49_chrVIIb:4733441-4735950(-) | 529    | TGME49_255690    | 57 kDa           | 2             | NR-362   |
| 2-oxo acid dehydrogenases acyltransferase (catalytic domain) domain-containing protein | TGVEG_chrIV:659424-665835(-)      | 669    | TGVEG_319920     | 70 kDa           | 3             | NR-20731 |
| 2-oxoglutarate/malate translocase OMT (OMT)                                            | TGME49_chrVIII:3047633-3050247(+) | 323    | TGME49_274060    | 35 kDa           | 2             | NR-362   |
| 3'5'-cyclic nucleotide phosphodiesterase domain-containing protein                     | TGVEG_chrVIII:2366782-2384313(-)  | 1731   | TGVEG_233040     | 195 kDa          | 1             | NR-20734 |
| 3'5'-cyclic nucleotide phosphodiesterase domain-containing protein                     | TGME49_chrla:73769-88830(+)       | 2238   | TGME49_293000    | 244 kDa          | 1             | NR-225   |
| 3'5'-cyclic nucleotide phosphodiesterase domain-containing protein                     | TGME49_chrVIII:2358180-2375740(-) | 1731   | TGME49_233040    | 195 kDa          | 1             | NR-362   |
| 5-formyltetrahydrofolate cyclo-ligase                                                  | TGME49_chrlb:591301-594355(+)     | 473    | TGME49_208090    | 52 kDa           | 1             | NR-225   |
| AAA domain protein                                                                     | TGVEG_chrVIIb:1596717-1605661(-)  | 1487   | TGVEG_261680     | 158 kDa          | 1             | NR-20730 |
| ABC1 family protein                                                                    | TGVEG_chrXII:2843851-2849844(+)   | 1900   | TGVEG_246600     | 205 kDa          | 1             | NR-20731 |
| acetyl-CoA carboxylase ACC1                                                            | TGVEG_chrII:237844-253913(-)      | 2612   | TGVEG_221320     | 288 kDa          | 2             | NR-20734 |
| acetyl-coA carboxylase ACC2                                                            | TGVEG_chrXII:1400421-1429456(-)   | 3400   | TGVEG_218560     | 365 kDa          | 2             | NR-223   |
| acetyltransferase, GNAT family protein                                                 | TGME49_chrIX:5391801-5394363(-)   | 519    | TGME49_305450    | 57 kDa           | 1             | NR-362   |
| acid phosphatase GAP50                                                                 | TGVEG_chrXII:941844-944726(-)     | 431    | TGVEG_219320     | 47 kDa           | 14            | NR-20731 |
| acid phosphatase GAP50 (GAP50)                                                         | TGME49_chrXII:969240-972134(-)    | 431    | TGME49_219320    | 47 kDa           | 9             | NR-362   |
| aconitate hydratase ACN/IRP                                                            | TGVEG_chrX:1293904-1301076(-)     | 1055   | TGVEG_226730     | 115 kDa          | 4             | NR-20731 |
| actin ACT1                                                                             | TGVEG_chrlb:997526-999088(+)      | 376    | TGVEG_209030     | 42 kDa           | 15            | NR-20731 |
| actin ACT1 (ACT1)                                                                      | TGME49_chrlb:998462-1000024(+)    | 376    | TGME49_209030    | 42 kDa           | 9             | NR-362   |
| acyl carrier protein ACP                                                               | TGVEG_chrVIIb:207502-208980(-)    | 183    | TGVEG_264080     | 19 kDa           | 1             | NR-223   |
| ADA2-A transcriptional co-activator SAGA component                                     | TGME49_chrXI:5701538-5709722(+)   | 1203   | TGME49_217050    | 126 kDa          | 1             | NR-225   |
| adenine nucleotide translocator, putative                                              | TGME49_chrXII:4937491-4938447(+)  | 318    | TGME49_249900    | 35 kDa           | 3             | NR-362   |
| adenylate kinase, putative                                                             | TGME49_chrX:2700827-2703461(+)    | 257    | TGME49_224900    | 29 kDa           | 3             | NR-225   |
| ADP ribosylation factor ARF1 (ARF1)                                                    | TGME49_chrIII:119823-123343(-)    | 554    | TGME49_276140    | 62 kDa           | 2             | NR-362   |
| AGC kinase                                                                             | TGME49_chrX:1854657-1856914(+)    | 343    | TGME49_226030    | 39 kDa           | 2             | NR-362   |

|                                                                                   |                                   |       |               |          |    |          |
|-----------------------------------------------------------------------------------|-----------------------------------|-------|---------------|----------|----|----------|
| alba 2                                                                            | TGVEG_chrXII:1251911-1253712(+)   | 148   | TGVEG_218820  | 15 kDa   | 1  | NR-223   |
| ALG6, ALG8 glycosyltransferase family protein                                     | TGVEG_chrVIIb:1429375-1436663(-)  | 1585  | TGVEG_262030  | 175 kDa  | 1  | NR-20730 |
| alkyl hydroperoxide reductase/ Thiol specific antioxidant/ Mal allergen, putative | TGME49_chrXII:2205011-2205601(-)  | 196   | TGME49_217890 | 22 kDa   | 2  | NR-362   |
| alpha tubulin TUBA1                                                               | TGVEG_chrXI:5296478-5298499(+)    | 453   | TGVEG_316400  | 50 kDa   | 11 | NR-20731 |
| alpha tubulin TUBA1 (TUBA1)                                                       | TGME49_chrXI:5274572-5276593(+)   | 453   | TGME49_316400 | 50 kDa   | 7  | NR-362   |
| Alpha-galactosidase                                                               | TGVEG_chrIII:2012031-2019748(+)   | 747   | TGVEG_254880  | 82 kDa   | 1  | NR-20731 |
| alveolin domain containing intermediate filament IMC1                             | TGVEG_chrVIII:1522790-1525565(+)  | 609   | TGVEG_231640  | 70 kDa   | 10 | NR-20731 |
| alveolin domain containing intermediate filament IMC1 (ALV1)                      | TGME49_chrVIII:1516857-1519632(+) | 609   | TGME49_231640 | 70 kDa   | 7  | NR-362   |
| alveolin domain containing intermediate filament IMC10                            | TGVEG_chrVIII:692086-694992(+)    | 560   | TGVEG_230210  | 61 kDa   | 5  | NR-223   |
| alveolin domain containing intermediate filament IMC10 (ALV12)                    | TGME49_chrVIII:685641-688988(+)   | 560   | TGME49_230210 | 61 kDa   | 3  | NR-362   |
| alveolin domain containing intermediate filament IMC3                             | TGVEG_chrXI:6470480-6472096(+)    | 538   | TGVEG_216000  | 58 kDa   | 2  | NR-44106 |
| alveolin domain containing intermediate filament IMC3 (ALV3)                      | TGME49_chrXI:6475497-6477113(+)   | 538   | TGME49_216000 | 58 kDa   | 5  | NR-362   |
| alveolin domain containing intermediate filament IMC4                             | TGVEG_chrVIII:1519116-1521276(-)  | 452   | TGVEG_231630  | 50 kDa   | 14 | NR-20731 |
| alveolin domain containing intermediate filament IMC4 (ALV4)                      | TGME49_chrVIII:1513141-1515301(-) | 452   | TGME49_231630 | 50 kDa   | 7  | NR-362   |
| alveolin domain containing intermediate filament IMC7                             | TGVEG_chrII:970042-973531(+)      | 429   | TGVEG_222220  | 47 kDa   | 4  | NR-20731 |
| alveolin domain containing intermediate filament IMC7 (IMC7)                      | TGME49_chrII:966861-970350(+)     | 429   | TGME49_222220 | 47 kDa   | 4  | NR-225   |
| amine-terminal region of chorein, A TM vesicle-mediated sorter                    | TGVEG_chrIX:5763139-5793311(+)    | 8847  | TGVEG_306020  | 953 kDa  | 4  | NR-20731 |
| amine-terminal region of chorein, A TM vesicle-mediated sorter                    | TGVEG_chrVIII:1815566-1850365(-)  | 10329 | TGVEG_232080  | 1101 kDa | 2  | NR-44106 |
| amine-terminal region of chorein, A TM vesicle-mediated sorter                    | TGVEG_chrX:1966028-2004434(+)     | 12207 | TGVEG_225745  | 1320 kDa | 1  | NR-44106 |
| amine-terminal region of chorein, A TM vesicle-mediated sorter                    | TGVEG_chrXI:3542605-3588791(-)    | 13455 | TGVEG_313630  | 1452 kDa | 2  | NR-44106 |

|                                                                                   |                                   |      |               |         |    |          |
|-----------------------------------------------------------------------------------|-----------------------------------|------|---------------|---------|----|----------|
| aminopeptidase n, putative                                                        | TGME49_chrX:3053388-3061374(+)    | 970  | TGME49_224460 | 109 kDa | 5  | NR-225   |
| AMP-binding enzyme domain-containing protein                                      | TGVEG_chrXI:1054466-1058151(-)    | 789  | TGVEG_310080  | 88 kDa  | 2  | NR-20731 |
| AMP-binding enzyme domain-containing protein                                      | TGME49_chrXII:1047117-1054789(-)  | 782  | TGME49_219230 | 87 kDa  | 1  | NR-362   |
| ankyrin repeat-containing protein                                                 | TGME49_chrVIIb:4775240-4780713(-) | 1158 | TGME49_255510 | 123 kDa | 1  | NR-362   |
| anticodon binding domain-containing protein                                       | TGVEG_chrIII:1526964-1536531(-)   | 1017 | TGVEG_254200  | 112 kDa | 1  | NR-223   |
| AP2 domain transcription factor AP2Ib-1                                           | TGVEG_chrlb:519166-526326(+)      | 2311 | TGVEG_208020  | 246 kDa | 1  | NR-223   |
| AP2 domain transcription factor AP2IV-3 (AP2IV3)                                  | TGME49_chrIV:1192145-1196254(+)   | 1369 | TGME49_318610 | 147 kDa | 2  | NR-225   |
| AP2 domain transcription factor AP2VIIa-6                                         | TGVEG_chrVIIa:2914892-2922208(+)  | 2438 | TGVEG_203050  | 257 kDa | 2  | NR-20730 |
| AP2 domain transcription factor AP2VIII-2                                         | TGVEG_chrVIII:2439049-2446560(-)  | 2503 | TGVEG_233120  | 257 kDa | 2  | NR-44106 |
| AP2 domain transcription factor AP2VIII-4                                         | TGVEG_chrVIII:3785624-3795877(-)  | 3417 | TGVEG_272710  | 357 kDa | 1  | NR-44106 |
| AP2 domain transcription factor AP2XI-4 (AP2XI4)                                  | TGME49_chrXI:4950718-4964341(+)   | 3236 | TGME49_315760 | 347 kDa | 1  | NR-362   |
| AP2 domain transcription factor AP2XII-4                                          | TGVEG_chrXII:3478353-3490211(-)   | 3837 | TGVEG_247700  | 402 kDa | 1  | NR-223   |
| AP2 domain transcription factor APVIIb-1/ADA2-B                                   | TGVEG_chrVIIb:1272584-1283508(-)  | 2728 | TGVEG_262420  | 287 kDa | 1  | NR-20730 |
| apical membrane antigen AMA1                                                      | TGVEG_chrVIIb:4969545-4974009(+)  | 569  | TGVEG_255260  | 63 kDa  | 5  | NR-20731 |
| apical membrane antigen AMA1                                                      | TGME49_chrVIIb:4948067-4952962(+) | 569  | TGME49_255260 | 63 kDa  | 3  | NR-225   |
| apicoplast-associated thioredoxin family protein Atrx1                            | TGME49_chrXI:2434995-2443124(-)   | 790  | TGME49_312110 | 87 kDa  | 2  | NR-362   |
| arginyl-tRNA synthetase family protein                                            | TGVEG_chrIV:2037644-2046380(-)    | 595  | TGVEG_210840  | 67 kDa  | 1  | NR-223   |
| ARID/BRIGHT DNA binding domain-containing protein                                 | TGVEG_chrXII:2668917-2682187(+)   | 2713 | TGVEG_246170  | 286 kDa | 1  | NR-223   |
| asparaginyl-tRNA synthetase (NOB+tRNA synthase)                                   | TGVEG_chrVIII:5233842-5237148(+)  | 676  | TGVEG_270510  | 75 kDa  | 5  | NR-20731 |
| ATP synthase beta subunit ATP-B                                                   | TGVEG_chrVIIb:1497583-1500684(-)  | 560  | TGVEG_261950  | 60 kDa  | 14 | NR-223   |
| ATP synthase beta subunit ATP-B (ATPB)                                            | TGME49_chrVIIb:1481297-1484394(-) | 560  | TGME49_261950 | 60 kDa  | 10 | NR-362   |
| ATP synthase F1 gamma subunit                                                     | TGME49_chrVIII:1630628-1635289(+) | 314  | TGME49_231910 | 35 kDa  | 1  | NR-362   |
| ATP synthase, putative                                                            | TGME49_chrX:1872830-1874941(-)    | 183  | TGME49_226000 | 19 kDa  | 2  | NR-225   |
| ATPase family associated with various cellular activities (AAA) subfamily protein | TGVEG_chrVI:2109284-2143838(+)    | 9030 | TGVEG_242625  | 976 kDa | 2  | NR-20734 |
| ATPase synthase subunit alpha, putative                                           | TGME49_chrVIIa:1815332-1822685(+) | 577  | TGME49_204400 | 62 kDa  | 2  | NR-362   |
| ATPase, AAA family protein                                                        | TGVEG_chrVIII:4902284-4913046(+)  | 1600 | TGVEG_270900  | 173 kDa | 1  | NR-20734 |

|                                                                      |                                   |      |               |         |    |          |
|----------------------------------------------------------------------|-----------------------------------|------|---------------|---------|----|----------|
| ATPase, AAA family protein                                           | TGVEG_chrXII:3277822-3293132(+)   | 3910 | TGVEG_247390  | 422 kDa | 2  | NR-44106 |
| ATPase/histidine kinase/DNA gyrase B/HSP90 domain-containing protein | TGVEG_chrII:2000278-2010773(+)    | 1440 | TGVEG_297780  | 155 kDa | 2  | NR-20731 |
| ATP-binding cassette G family transporter ABCG77                     | TGVEG_chrXI:4827302-4833020(-)    | 1163 | TGVEG_315560  | 127 kDa | 1  | NR-44106 |
| ATP-dependent metallopeptidase HflB subfamily protein                | TGME49_chrVIIa:3150425-3162195(-) | 1188 | TGME49_202630 | 128 kDa | 1  | NR-225   |
| ATP-dependent metallopeptidase HflB subfamily protein                | TGVEG_chrVIIa:3238625-3250149(-)  | 1188 | TGVEG_202630  | 128 kDa | 1  | NR-44106 |
| aurora kinase                                                        | TGVEG_chrVIIa:2953394-2961829(-)  | 2811 | TGVEG_203010  | 298 kDa | 1  | NR-44106 |
| autophagy-related cysteine peptidase atg4, putative                  | TGME49_chrVIIa:958359-970508(-)   | 3752 | TGME49_206450 | 397 kDa | 2  | NR-362   |
| beta tubulin                                                         | TGME49_chrIX:866875-869427(-)     | 449  | TGME49_266960 | 50 kDa  | 13 | NR-362   |
| beta-tubulin                                                         | TGVEG_chrIX:897735-899788(-)      | 449  | TGVEG_266960  | 50 kDa  | 10 | NR-20731 |
| beta-tubulin, putative                                               | TGME49_chrII:489181-491518(-)     | 449  | TGME49_221620 | 50 kDa  | 3  | NR-225   |
| Brf1p family coiled coil protein                                     | TGVEG_chrVIII:2104392-2109017(+)  | 468  | TGVEG_232440  | 54 kDa  | 36 | NR-20731 |
| brix domain-containing protein                                       | TGVEG_chrVIII:3237691-3241746(-)  | 673  | TGVEG_273840  | 74 kDa  | 3  | NR-20731 |
| brix domain-containing protein                                       | TGVEG_chrVIII:2143882-2145600(-)  | 401  | TGVEG_232520  | 43 kDa  | 1  | NR-44106 |
| calcium binding protein precursor, putative                          | TGME49_chrVIII:292153-294701(-)   | 335  | TGME49_229480 | 38 kDa  | 3  | NR-362   |
| calcium-dependent protein kinase CDPK1                               | TGVEG_chrIV:2515865-2521227(+)    | 582  | TGVEG_301440  | 65 kDa  | 5  | NR-20731 |
| calcium-dependent protein kinase CDPK3                               | TGVEG_chrIX:5667331-5674886(+)    | 537  | TGVEG_305860  | 60 kDa  | 3  | NR-20731 |
| calcium-dependent protein kinase CDPK3 (CDPK3)                       | TGME49_chrIX:5629850-5637411(+)   | 537  | TGME49_305860 | 60 kDa  | 3  | NR-225   |
| calcium-dependent protein kinase CDPK5                               | TGVEG_chrX:2541605-2546874(+)     | 682  | TGVEG_224950  | 75 kDa  | 1  | NR-20734 |
| calmodulin, putative                                                 | TGME49_chrIX:5203644-5204045(+)   | 133  | TGME49_305050 | 15 kDa  | 1  | NR-362   |
| CAM kinase, SNF1 family                                              | TGME49_chrXI:4558985-4569066(-)   | 3194 | TGME49_315190 | 342 kDa | 2  | NR-225   |
| CAM kinase, SNF1/AMK1 family ToxPK1                                  | TGVEG_chrVI:2684802-2690111(+)    | 360  | TGVEG_243500  | 41 kDa  | 1  | NR-44106 |
| cAMP-dependent protein kinase                                        | TGME49_chrIb:1612432-1614147(-)   | 571  | TGME49_209985 | 62 kDa  | 3  | NR-225   |
| cAMP-dependent protein kinase regulatory subunit                     | TGVEG_chrVI:1881430-1886805(-)    | 385  | TGVEG_242070  | 43 kDa  | 1  | NR-223   |
| cAMP-dependent protein kinase regulatory subunit                     | TGME49_chrVI:1871928-1877303(-)   | 385  | TGME49_242070 | 43 kDa  | 2  | NR-225   |
| catalase                                                             | TGVEG_chrVIII:1980492-1986583(-)  | 502  | TGVEG_232250  | 57 kDa  | 1  | NR-223   |
| catalase                                                             | TGME49_chrVIII:1973118-1980623(-) | 502  | TGME49_232250 | 57 kDa  | 3  | NR-225   |
| cathepsin CPC2 (CPC2)                                                | TGME49_chrIII:127108-135573(-)    | 753  | TGME49_276130 | 83 kDa  | 1  | NR-225   |

|                                                                       |                                   |      |               |         |    |          |
|-----------------------------------------------------------------------|-----------------------------------|------|---------------|---------|----|----------|
| cell division protein CDC48CY                                         | TGVEG_chrVIII:3674338-3683521(-)  | 811  | TGVEG_273090  | 89 kDa  | 8  | NR-20731 |
| cell division protein CDC48CY (CDC48CY)                               | TGME49_chrVIII:3664539-3673736(-) | 811  | TGME49_273090 | 89 kDa  | 2  | NR-362   |
| central domain galactose oxidase                                      | TGVEG_chrVIIa:2569642-2579130(-)  | 1403 | TGVEG_203480  | 146 kDa | 1  | NR-44106 |
| centrin 2                                                             | TGVEG_chrXII:5034782-5036559(-)   | 170  | TGVEG_250340  | 19 kDa  | 1  | NR-223   |
| chaperonin , putative                                                 | TGME49_chrVIIb:493203-495249(-)   | 127  | TGME49_263530 | 14 kDa  | 1  | NR-225   |
| chaperonin cpn60, putative                                            | TGME49_chrVI:1335457-1339036(+)   | 667  | TGME49_240600 | 72 kDa  | 1  | NR-225   |
| chaperonin GroS protein                                               | TGVEG_chrVIII:3154058-3158871(+)  | 374  | TGVEG_273960  | 40 kDa  | 2  | NR-20731 |
| chaperonin protein BiP                                                | TGVEG_chrXI:2237128-2240503(-)    | 668  | TGVEG_311720  | 73 kDa  | 72 | NR-20731 |
| chaperonin protein BiP                                                | TGME49_chrXI:2225378-2228753(-)   | 668  | TGME49_311720 | 73 kDa  | 16 | NR-362   |
| 'chromo' (CHRromatin Organization MODifier) domain-containing protein | TGME49_chrVIII:6575054-6586322(-) | 1405 | TGME49_268280 | 154 kDa | 1  | NR-225   |
| chromodomain helicase DNA binding protein CHD1/SWI2/SNF2              | TGVEG_chrVIIb:3487792-3505890(-)  | 2492 | TGVEG_258240  | 271 kDa | 1  | NR-20734 |
| Chromosome-associated kinesin KLP1, putative                          | TGME49_chrIII:333918-342715(+)    | 928  | TGME49_221420 | 104 kDa | 12 | NR-362   |
| clathrin heavy chain, putative                                        | TGME49_chrIX:3962472-3974679(-)   | 1731 | TGME49_290950 | 195 kDa | 1  | NR-225   |
| CMGC kinase, CK2 family                                               | TGVEG_chrVIIb:832819-837930(+)    | 539  | TGVEG_263070  | 60 kDa  | 3  | NR-20731 |
| Coiled-coil domain containing 124 family protein                      | TGME49_chrX:5813454-5816517(+)    | 231  | TGME49_237260 | 25 kDa  | 1  | NR-362   |
| corepressor complex CRC230                                            | TGVEG_chrIX:5413659-5427286(+)    | 1916 | TGVEG_305340  | 207 kDa | 1  | NR-20731 |
| cullin family protein                                                 | TGVEG_chrV:2367421-2380607(-)     | 2442 | TGVEG_285445  | 266 kDa | 1  | NR-20731 |
| CW-type Zinc Finger protein                                           | TGME49_chrIII:120563-131574(-)    | 2794 | TGME49_221200 | 296 kDa | 1  | NR-225   |
| cyclic nucleotide-binding domain-containing protein                   | TGVEG_chrXII:1116653-1144032(-)   | 2723 | TGVEG_219070  | 308 kDa | 1  | NR-223   |
| cyclin-dependent kinase                                               | TGVEG_chrVI:1011950-1024948(+)    | 2325 | TGVEG_239910  | 255 kDa | 1  | NR-20730 |
| cyclophilin                                                           | TGVEG_chrIII:137136-139009(+)     | 179  | TGVEG_221210  | 20 kDa  | 3  | NR-20731 |
| cyclophilin precursor                                                 | TGVEG_chrVIIa:1279855-1280901(+)  | 348  | TGVEG_205700  | 38 kDa  | 3  | NR-223   |
| cytochrome c1, heme protein                                           | TGME49_chrXII:2840190-2843546(+)  | 398  | TGME49_246540 | 46 kDa  | 1  | NR-225   |
| cytochrome c1, heme protein                                           | TGVEG_chrXII:2808475-2811853(+)   | 398  | TGVEG_246540  | 46 kDa  | 2  | NR-44106 |
| cytochrome p450 superfamily protein                                   | TGVEG_chrXI:4991859-4998278(-)    | 553  | TGVEG_315770  | 63 kDa  | 2  | NR-20730 |
| cytosolic tRNA-Ala synthetase                                         | TGVEG_chrXII:835122-848888(-)     | 1280 | TGVEG_219540  | 139 kDa | 2  | NR-20731 |
| D-3-phosphoglycerate dehydrogenase                                    | TGVEG_chrVI:952061-960850(-)      | 604  | TGVEG_239820  | 65 kDa  | 3  | NR-20731 |
| D-3-phosphoglycerate dehydrogenase                                    | TGME49_chrVI:939130-947919(-)     | 604  | TGME49_239820 | 65 kDa  | 2  | NR-225   |
| DALR anticodon binding domain-containing protein                      | TGVEG_chrVIII:2865426-2875451(+)  | 1307 | TGVEG_233860  | 145 kDa | 1  | NR-20730 |

|                                                      |                                   |      |               |         |    |          |
|------------------------------------------------------|-----------------------------------|------|---------------|---------|----|----------|
| DEAD (Asp-Glu-Ala-Asp) box polypeptide DDX39         | TGVEG_chrXI:5838208-5842298(+)    | 434  | TGVEG_216860  | 49 kDa  | 2  | NR-223   |
| DEAD (Asp-Glu-Ala-Asp) box polypeptide DDX39 (DDX39) | TGME49_chrXI:5844665-5848755(+)   | 434  | TGME49_216860 | 49 kDa  | 2  | NR-225   |
| DEAD (Asp-Glu-Ala-Asp) box polypeptide DDX3X         | TGVEG_chrX:1652355-1655316(+)     | 734  | TGVEG_226250  | 79 kDa  | 2  | NR-20731 |
| DEAD/DEAH box helicase domain-containing protein     | TGVEG_chrVIIb:2878150-2887878(-)  | 950  | TGVEG_259220  | 104 kDa | 1  | NR-223   |
| DEAD/DEAH box helicase domain-containing protein     | TGVEG_chrIa:826262-849317(-)      | 2434 | TGVEG_294350  | 274 kDa | 2  | NR-44106 |
| DEAD-family helicase                                 | TGME49_chrII:2198046-2210150(+)   | 1158 | TGME49_298020 | 131 kDa | 1  | NR-362   |
| dehydrogenase E1 component family protein            | TGVEG_chrVI:725272-731095(-)      | 571  | TGVEG_239490  | 64 kDa  | 7  | NR-20731 |
| dense granule protein GRA1                           | TGVEG_chrVIII:5323347-5324054(-)  | 190  | TGVEG_270250  | 20 kDa  | 22 | NR-223   |
| dense granule protein GRA1 (GRA1)                    | TGME49_chrVIII:5309663-5310370(-) | 190  | TGME49_270250 | 20 kDa  | 9  | NR-362   |
| dense granule protein GRA12                          | TGVEG_chrIX:2692412-2694205(-)    | 436  | TGVEG_288650  | 48 kDa  | 21 | NR-20731 |
| dense granule protein GRA12 (GRA12)                  | TGME49_chrIX:2656853-2658646(-)   | 436  | TGME49_288650 | 48 kDa  | 16 | NR-362   |
| dense granule protein GRA14                          | TGVEG_chrVI:895984-897210(-)      | 408  | TGVEG_239740  | 45 kDa  | 4  | NR-20731 |
| dense granule protein GRA14 (GRA14)                  | TGME49_chrVI:883268-884494(-)     | 408  | TGME49_239740 | 45 kDa  | 2  | NR-362   |
| dense granule protein GRA2                           | TGVEG_chrX:759771-760569(-)       | 185  | TGVEG_227620  | 20 kDa  | 2  | NR-20730 |
| dense granule protein GRA2 (GRA2)                    | TGME49_chrX:869836-870634(-)      | 185  | TGME49_227620 | 20 kDa  | 3  | NR-362   |
| dense granule protein GRA3                           | TGVEG_chrX:939398-940066(-)       | 222  | TGVEG_227280  | 24 kDa  | 32 | NR-20731 |
| dense granule protein GRA3 (GRA3)                    | TGME49_chrX:1049718-1050380(-)    | 220  | TGME49_227280 | 24 kDa  | 3  | NR-362   |
| dense granule protein GRA4                           | TGVEG_chrXI:1601110-1602147(-)    | 345  | TGVEG_310780  | 36 kDa  | 5  | NR-20730 |
| dense granule protein GRA4 (GRA4)                    | TGME49_chrXI:1588521-1589558(-)   | 345  | TGME49_310780 | 36 kDa  | 7  | NR-362   |
| dense granule protein GRA5                           | TGVEG_chrV:1779551-1779913(+)     | 120  | TGVEG_286450  | 13 kDa  | 4  | NR-20734 |
| dense granule protein GRA5 (GRA5)                    | TGME49_chrV:1825437-1825799(+)    | 120  | TGME49_286450 | 13 kDa  | 2  | NR-225   |
| dense granule protein GRA6 (GRA6)                    | TGME49_chrX:7271843-7272517(-)    | 224  | TGME49_275440 | 23 kDa  | 2  | NR-225   |
| dense granule protein GRA7                           | TGVEG_chrVIIa:2692320-2693030(+)  | 236  | TGVEG_203310  | 26 kDa  | 10 | NR-20731 |
| dense granule protein GRA7 (GRA7)                    | TGME49_chrVIIa:2604424-2605134(+) | 236  | TGME49_203310 | 26 kDa  | 18 | NR-362   |
| dense granule protein GRA8                           | TGVEG_chrIII:1913470-1914204(+)   | 244  | TGVEG_254720  | 26 kDa  | 1  | NR-44106 |
| dense granule protein GRA8 (GRA8)                    | TGME49_chrIII:1904580-1905389(+)  | 269  | TGME49_254720 | 29 kDa  | 3  | NR-362   |
| dense granule protein GRA9                           | TGVEG_chrXII:5441809-5443372(+)   | 318  | TGVEG_251540  | 35 kDa  | 2  | NR-44106 |
| dense granule protein GRA9 (GRA9)                    | TGME49_chrXII:5450509-5452072(+)  | 318  | TGME49_251540 | 35 kDa  | 5  | NR-362   |
| dense-granule antigen DG32                           | TGVEG_chrII:932115-933439(+)      | 300  | TGVEG_222170  | 34 kDa  | 2  | NR-223   |
| dihydropteroate synthase                             | TGVEG_chrVIIb:2793825-2798828(-)  | 748  | TGVEG_259550  | 83 kDa  | 2  | NR-20731 |

|                                                              |                                   |      |               |         |   |          |
|--------------------------------------------------------------|-----------------------------------|------|---------------|---------|---|----------|
| Di-sulfide bridge nucleocytoplasmic transport domain protein | TGVEG_chrVIIb:1398643-1401577(+)  | 739  | TGVEG_262080  | 80 kDa  | 1 | NR-20734 |
| DNA-directed RNA polymerase III RPC6                         | TGVEG_chrXII:1888977-1899756(-)   | 325  | TGVEG_217580  | 36 kDa  | 2 | NR-223   |
| DnaJ domain-containing protein                               | TGVEG_chrX:2784984-2797121(-)     | 3043 | TGVEG_224670  | 320 kDa | 2 | NR-20731 |
| DnaJ domain-containing protein                               | TGVEG_chrX:6265866-6271086(-)     | 755  | TGVEG_214530  | 82 kDa  | 1 | NR-20734 |
| DnaJ domain-containing protein                               | TGVEG_chrIX:3944440-3949205(-)    | 964  | TGVEG_290880  | 109 kDa | 1 | NR-223   |
| DnaJ domain-containing protein                               | TGVEG_chrVIII:1791708-1803137(-)  | 869  | TGVEG_232050  | 96 kDa  | 2 | NR-223   |
| DnaJ family chaperone, putative                              | TGME49_chrXI:1901474-1906488(-)   | 426  | TGME49_311240 | 47 kDa  | 1 | NR-362   |
| DnaJ family Sec63 protein                                    | TGVEG_chrVIIb:2121702-2128272(-)  | 675  | TGVEG_260630  | 77 kDa  | 2 | NR-20730 |
| DnaK family protein                                          | TGVEG_chrX:1200684-1203551(-)     | 955  | TGVEG_226830  | 105 kDa | 3 | NR-20731 |
| DnaK family protein                                          | TGVEG_chrXII:949862-956825(+)     | 818  | TGVEG_219310  | 90 kDa  | 5 | NR-20731 |
| DnaK family protein                                          | TGME49_chrX:1311834-1315968(-)    | 938  | TGME49_226830 | 103 kDa | 1 | NR-225   |
| DnaK family protein                                          | TGME49_chrXII:977608-984396(+)    | 818  | TGME49_219310 | 90 kDa  | 2 | NR-362   |
| domain K- type RNA binding proteins family protein           | TGVEG_chrX:5108297-5114078(+)     | 570  | TGVEG_235930  | 64 kDa  | 1 | NR-20731 |
| Dopey, N-terminal domain-containing protein                  | TGME49_chrX:6126102-6147431(+)    | 3107 | TGME49_214230 | 334 kDa | 3 | NR-225   |
| dynactin subunit 4                                           | TGVEG_chrXI:5228498-5230567(+)    | 689  | TGVEG_316240  | 75 kDa  | 3 | NR-20730 |
| dynein heavy chain family protein                            | TGME49_chrXI:944123-988175(-)     | 4610 | TGME49_309980 | 523 kDa | 1 | NR-362   |
| dynein light intermediate chain                              | TGVEG_chrXII:3406650-3414230(+)   | 697  | TGVEG_247600  | 75 kDa  | 1 | NR-223   |
| dynein, axonemal, heavy chain 2 family protein               | TGVEG_chrX:5061786-5106228(-)     | 4547 | TGVEG_235920  | 521 kDa | 2 | NR-20730 |
| EF hand domain-containing protein                            | TGVEG_chrVI:671344-673117(+)      | 513  | TGVEG_239430  | 58 kDa  | 1 | NR-20730 |
| EF hand domain-containing protein                            | TGVEG_chrXI:5048899-5078623(+)    | 6368 | TGVEG_315860  | 690 kDa | 1 | NR-20731 |
| EF hand domain-containing protein                            | TGME49_chrXI:5027016-5056738(+)   | 6368 | TGME49_315860 | 690 kDa | 2 | NR-362   |
| EF hand domain-containing protein                            | TGVEG_chrX:3665716-3668600(+)     | 716  | TGVEG_223520  | 82 kDa  | 2 | NR-44106 |
| EF-1 guanine nucleotide exchange domain-containing protein   | TGVEG_chrX:1548706-1551511(-)     | 349  | TGVEG_226410  | 38 kDa  | 3 | NR-20731 |
| elongation factor 1-alpha (EF-1-ALPHA), putative             | TGME49_chrla:1148058-1149678(-)   | 448  | TGME49_294800 | 49 kDa  | 7 | NR-362   |
| elongation factor 1-gamma, putative                          | TGME49_chrXII:185954-188540(+)    | 394  | TGME49_300140 | 44 kDa  | 1 | NR-362   |
| elongation factor Tu GTP binding domain-containing protein   | TGVEG_chrXII:6028018-6039302(-)   | 2560 | TGVEG_278550  | 275 kDa | 1 | NR-20731 |
| elongation factor Tu GTP binding domain-containing protein   | TGVEG_chrVIII:6360722-6372992(-)  | 1697 | TGVEG_268710  | 179 kDa | 1 | NR-44106 |
| elongation factor Tu, putative                               | TGME49_chrVIIb:1315706-1319365(-) | 552  | TGME49_262380 | 60 kDa  | 2 | NR-225   |

|                                                                          |                                   |      |               |         |    |          |
|--------------------------------------------------------------------------|-----------------------------------|------|---------------|---------|----|----------|
| endonuclease/exonuclease/phosphatase family protein                      | TGVEG_chrVIIb:2785936-2792035(+)  | 1558 | TGVEG_259560  | 165 kDa | 1  | NR-20734 |
| enhancer of polycomb-like protein                                        | TGVEG_chrX:2498459-2505619(-)     | 1474 | TGVEG_225000  | 155 kDa | 1  | NR-20731 |
| enolase 1                                                                | TGME49_chrVIII:6247157-6248985(-) | 444  | TGME49_268860 | 48 kDa  | 8  | NR-225   |
| enolase 2                                                                | TGVEG_chrVIII:6265905-6267983(-)  | 475  | TGVEG_268850  | 52 kDa  | 12 | NR-223   |
| enolase 2                                                                | TGME49_chrVIII:6250570-6252648(-) | 475  | TGME49_268850 | 52 kDa  | 2  | NR-362   |
| eukaryotic aspartyl protease superfamily protein                         | TGVEG_chrVIIb:1680220-1685668(-)  | 921  | TGVEG_261530  | 101 kDa | 1  | NR-20731 |
| eukaryotic glutathione synthase, atp binding domain-containing protein   | TGME49_chrX:1353078-1357505(-)    | 1475 | TGME49_226800 | 161 kDa | 2  | NR-225   |
| eukaryotic initiation factor-2, alpha subunit                            | TGVEG_chrXI:3210631-3214712(-)    | 347  | TGVEG_313230  | 39 kDa  | 2  | NR-20731 |
| eukaryotic initiation factor-4A, putative                                | TGME49_chrXII:5194324-5196361(-)  | 412  | TGME49_250770 | 47 kDa  | 5  | NR-225   |
| eukaryotic porin protein                                                 | TGVEG_chrVIIb:649926-653650(-)    | 290  | TGVEG_263300  | 31 kDa  | 11 | NR-20731 |
| eukaryotic porin protein                                                 | TGME49_chrVIIb:643032-646756(-)   | 290  | TGME49_263300 | 31 kDa  | 4  | NR-362   |
| eukaryotic translation initiation factor 3 subunit 6 interacting protein | TGVEG_chrVIII:3501795-3507673(-)  | 639  | TGVEG_273460  | 75 kDa  | 3  | NR-20731 |
| FAD Malate-dehydrogenase (MDH-FAD)                                       | TGVEG_chrIX:2616265-2620461(-)    | 550  | TGVEG_288500  | 60 kDa  | 2  | NR-20730 |
| FATC domain-containing protein                                           | TGVEG_chrV:2982975-3016395(-)     | 6012 | TGVEG_283702  | 648 kDa | 1  | NR-20734 |
| fatty acyl-CoA desaturase, putative                                      | TGME49_chrVI:332497-341919(-)     | 1042 | TGME49_238950 | 117 kDa | 2  | NR-225   |
| flavoprotein subunit of succinate dehydrogenase                          | TGVEG_chrX:6964389-6973953(-)     | 669  | TGVEG_215590  | 73 kDa  | 1  | NR-20731 |
| formin FRM2                                                              | TGVEG_chrVIIa:869556-886746(+)    | 4709 | TGVEG_206580  | 491 kDa | 1  | NR-20734 |
| formin FRM3                                                              | TGVEG_chrV:924726-933269(-)       | 2847 | TGVEG_213370  | 299 kDa | 1  | NR-20734 |
| fructose-1,6-bisphosphate aldolase                                       | TGVEG_chrX:5172443-5174481(+)     | 433  | TGVEG_236040  | 47 kDa  | 14 | NR-20731 |
| fructose-1,6-bisphosphate aldolase                                       | TGME49_chrX:5250532-5252570(+)    | 433  | TGME49_236040 | 47 kDa  | 2  | NR-362   |
| fructose-bisphosphate aldolase, putative                                 | TGME49_chrX:5253245-5255390(+)    | 432  | TGME49_236050 | 47 kDa  | 4  | NR-362   |
| fumarate hydratase                                                       | TGME49_chrIX:710487-716309(+)     | 776  | TGME49_267330 | 84 kDa  | 1  | NR-362   |
| FUSE-binding protein 2 / KH-type splicing regulatory protein             | TGVEG_chrXI:5965811-5969850(-)    | 941  | TGVEG_216670  | 100 kDa | 3  | NR-20731 |
| GAF domain protein                                                       | TGVEG_chrX:5314319-5320721(-)     | 1026 | TGVEG_236510  | 110 kDa | 4  | NR-20731 |
| galactosyltransferase amine-terminal domain protein                      | TGVEG_chrVIIb:2995709-3001462(-)  | 1109 | TGVEG_259080  | 124 kDa | 1  | NR-20734 |
| GAP40 protein                                                            | TGVEG_chrXII:4876799-4878074(+)   | 385  | TGVEG_249850  | 43 kDa  | 6  | NR-20731 |
| Gar1/Naf1 RNA-binding region protein                                     | TGVEG_chrIX:3297522-3302610(+)    | 989  | TGVEG_289510  | 102 kDa | 1  | NR-223   |



|                                                                                |                                   |      |               |         |    |          |
|--------------------------------------------------------------------------------|-----------------------------------|------|---------------|---------|----|----------|
| GCC2 and GCC3 domain-containing protein                                        | TGVEG_chrlb:90094-136808(+)       | 5081 | TGVEG_207480  | 542 kDa | 2  | NR-20731 |
| GDA1/CD39 (nucleoside phosphatase) family protein                              | TGVEG_chrX:2232286-2234220(-)     | 644  | TGVEG_225290  | 70 kDa  | 2  | NR-20734 |
| glucose-6-phosphate 1-dehydrogenase                                            | TGVEG_chrla:707186-714041(+)      | 560  | TGVEG_294200  | 63 kDa  | 24 | NR-20731 |
| glucose-6-phosphate 1-dehydrogenase                                            | TGVEG_chrXII:5839079-5852248(+)   | 878  | TGVEG_278830  | 98 kDa  | 3  | NR-20731 |
| glucose-6-phosphate 1-dehydrogenase                                            | TGME49_chrla:697682-705095(+)     | 560  | TGME49_294200 | 63 kDa  | 4  | NR-362   |
| glucose-6-phosphate 1-dehydrogenase                                            | TGME49_chrXII:5833297-5847457(+)  | 878  | TGME49_278830 | 98 kDa  | 2  | NR-362   |
| glutamate/leucine/phenylalanine/valine dehydrogenase family protein            | TGVEG_chrXII:4484163-4494687(+)   | 1206 | TGVEG_249390  | 136 kDa | 2  | NR-223   |
| glutamate/leucine/phenylalanine/valine dehydrogenase family protein            | TGME49_chrXII:4509664-4520160(+)  | 1206 | TGME49_249390 | 136 kDa | 1  | NR-225   |
| glutamic acid-rcih protein, putative                                           | TGME49_chrlb:1507993-1532330(+)   | 4971 | TGME49_209880 | 535 kDa | 2  | NR-362   |
| glyceraldehyde-3-phosphate dehydrogenase GAPDH1                                | TGVEG_chrIX:3415149-3417212(-)    | 489  | TGVEG_289690  | 53 kDa  | 9  | NR-223   |
| glyceraldehyde-3-phosphate dehydrogenase GAPDH1 (GAPDH1)                       | TGME49_chrIX:3379273-3381336(-)   | 489  | TGME49_289690 | 53 kDa  | 6  | NR-362   |
| glyceraldehyde-3-phosphate dehydrogenase GAPDH2                                | TGVEG_chrVIII:6018561-6022475(-)  | 995  | TGVEG_269190  | 105 kDa | 4  | NR-20731 |
| glyceraldehyde-3-phosphate dehydrogenase GAPDH2 (GAPDH2)                       | TGME49_chrVIII:6002854-6006768(-) | 995  | TGME49_269190 | 105 kDa | 2  | NR-225   |
| glycerol-3-phosphate-acyltransferase                                           | TGVEG_chrVIIb:4317179-4328550(-)  | 1002 | TGVEG_256980  | 110 kDa | 1  | NR-44106 |
| glycine cleavage T-protein (aminomethyl transferase) domain-containing protein | TGVEG_chrV:2896296-2906618(+)     | 1807 | TGVEG_283820  | 197 kDa | 1  | NR-20734 |
| glycoprotein                                                                   | TGVEG_chrX:6424155-6426176(+)     | 283  | TGVEG_214790  | 31 kDa  | 2  | NR-223   |
| glycoprotein                                                                   | TGME49_chrX:6496460-6498480(+)    | 283  | TGME49_214790 | 31 kDa  | 1  | NR-362   |
| glycosyltransferase                                                            | TGME49_chrlb:1578753-1592881(+)   | 1707 | TGME49_209960 | 189 kDa | 1  | NR-225   |
| glycyl-tRNA synthetase                                                         | TGVEG_chrVIIb:4311662-4314967(+)  | 771  | TGVEG_256990  | 86 kDa  | 2  | NR-20731 |
| GRAM domain-containing protein                                                 | TGVEG_chrXI:2385652-2404518(+)    | 2528 | TGVEG_311920  | 272 kDa | 1  | NR-20734 |
| GTPase RAB7                                                                    | TGVEG_chrXII:4208484-4213655(-)   | 432  | TGVEG_248880  | 48 kDa  | 1  | NR-223   |
| GTP-binding nuclear protein ran/tc4                                            | TGVEG_chrXII:3787577-3790634(+)   | 229  | TGVEG_248340  | 26 kDa  | 8  | NR-20731 |
| GTP-binding nuclear protein ran/tc4                                            | TGME49_chrXII:3816745-3819802(+)  | 229  | TGME49_248340 | 26 kDa  | 3  | NR-362   |
| guanine nucleotide-binding protein                                             | TGVEG_chrXI:5809811-5813405(-)    | 321  | TGVEG_216880  | 35 kDa  | 1  | NR-223   |
| HEAT repeat-containing protein                                                 | TGVEG_chrlb:482700-493495(+)      | 1450 | TGVEG_207970  | 156 kDa | 1  | NR-20730 |
| HEAT repeat-containing protein                                                 | TGVEG_chrVIIa:353929-371426(-)    | 3407 | TGVEG_280540  | 368 kDa | 2  | NR-20730 |
| HEAT repeat-containing protein                                                 | TGVEG_chrVIII:1485868-1497105(-)  | 1169 | TGVEG_231600  | 128 kDa | 2  | NR-223   |

|                                                               |                                   |       |               |          |    |          |
|---------------------------------------------------------------|-----------------------------------|-------|---------------|----------|----|----------|
| HEAT repeat-containing protein                                | TGVEG_chrVIIa:509338-528118(+)    | 4132  | TGVEG_280390  | 442 kDa  | 1  | NR-223   |
| HEAT repeat-containing protein                                | TGME49_chrIX:1239446-1251938(+)   | 914   | TGME49_266280 | 102 kDa  | 1  | NR-362   |
| HEAT repeat-containing protein                                | TGME49_chrVIIa:312234-329357(-)   | 3381  | TGME49_280540 | 365 kDa  | 2  | NR-362   |
| HEAT repeat-containing protein                                | TGME49_chrIX:2056664-2069930(-)   | 3442  | TGME49_264752 | 368 kDa  | 2  | NR-362   |
| heat shock protein                                            | TGVEG_chrXII:5576952-5581918(-)   | 728   | TGVEG_251780  | 78 kDa   | 8  | NR-20731 |
| heat shock protein                                            | TGVEG_chrVIII:2297594-2298401(-)  | 185   | TGVEG_324600  | 20 kDa   | 8  | NR-223   |
| heat shock protein                                            | TGME49_chrXII:5582774-5587740(-)  | 728   | TGME49_251780 | 78 kDa   | 4  | NR-362   |
| heat shock protein 40, putative                               | TGME49_chrIX:1622549-1628560(+)   | 336   | TGME49_265310 | 37 kDa   | 1  | NR-225   |
| heat shock protein 90, putative                               | TGME49_chrVI:3356828-3362144(+)   | 847   | TGME49_244560 | 97 kDa   | 6  | NR-362   |
| heat shock protein HSP20 (HSP20)                              | TGME49_chrVIII:2288062-2289106(-) | 185   | TGME49_232940 | 20 kDa   | 4  | NR-362   |
| heat shock protein HSP21 (HSP21)                              | TGME49_chrXI:2818748-2821102(+)   | 195   | TGME49_312600 | 21 kDa   | 2  | NR-225   |
| heat shock protein HSP29 (HSP29)                              | TGME49_chrIX:3340230-3341704(-)   | 272   | TGME49_289600 | 30 kDa   | 1  | NR-225   |
| heat shock protein HSP60                                      | TGVEG_chrXII:3381386-3385372(-)   | 575   | TGVEG_247550  | 61 kDa   | 8  | NR-223   |
| heat shock protein HSP60 (HSP60)                              | TGME49_chrXII:3411121-3415093(-)  | 575   | TGME49_247550 | 61 kDa   | 3  | NR-362   |
| heat shock protein HSP70                                      | TGVEG_chrVIII:3298080-3300083(-)  | 667   | TGVEG_273760  | 72 kDa   | 20 | NR-20731 |
| heat shock protein HSP70 (HSP70)                              | TGME49_chrVIII:3289396-3291420(-) | 674   | TGME49_273760 | 73 kDa   | 14 | NR-362   |
| heat shock protein HSP90                                      | TGVEG_chrIX:2518767-2523154(+)    | 708   | TGVEG_288380  | 82 kDa   | 20 | NR-20731 |
| heat shock protein HSP90 (HSP90)                              | TGME49_chrIX:2483404-2487798(+)   | 708   | TGME49_288380 | 82 kDa   | 10 | NR-362   |
| HECT-domain (ubiquitin-transferase) domain-containing protein | TGVEG_chrlb:939289-978093(-)      | 12299 | TGVEG_209000  | 1311 kDa | 1  | NR-20734 |
| HECT-domain (ubiquitin-transferase) domain-containing protein | TGME49_chrVIIa:193314-255431(-)   | 17226 | TGME49_280660 | 1855 kDa | 1  | NR-362   |
| HECT-domain (ubiquitin-transferase) domain-containing protein | TGVEG_chrVIIa:234399-287956(-)    | 15897 | TGVEG_280660  | 1711 kDa | 2  | NR-44106 |
| HECT-domain (ubiquitin-transferase) domain-containing protein | TGVEG_chrla:1589377-1619906(-)    | 8007  | TGVEG_295710  | 841 kDa  | 2  | NR-44106 |
| helicase associated domain (ha2) protein                      | TGME49_chrIV:1321030-1334390(-)   | 2234  | TGME49_318440 | 237 kDa  | 2  | NR-225   |
| histone H2A1                                                  | TGVEG_chrVIII:1821751-1822293(-)  | 180   | TGVEG_261250  | 20 kDa   | 23 | NR-20730 |
| histone H2A1                                                  | TGME49_chrVIIb:1806335-1806877(-) | 180   | TGME49_261250 | 20 kDa   | 3  | NR-225   |
| histone H2AX                                                  | TGME49_chrVIIb:1648939-1649346(-) | 135   | TGME49_261580 | 15 kDa   | 12 | NR-225   |
| histone H2AZ                                                  | TGVEG_chrXII:151840-153578(-)     | 155   | TGVEG_300200  | 16 kDa   | 8  | NR-20731 |
| histone H2AZ                                                  | TGME49_chrXII:159657-161396(-)    | 155   | TGME49_300200 | 16 kDa   | 7  | NR-362   |
| histone H2Ba                                                  | TGME49_chrIX:5259734-5260084(+)   | 116   | TGME49_305160 | 13 kDa   | 2  | NR-225   |
| histone H2Bb                                                  | TGVEG_chrXII:5628051-5628398(+)   | 115   | TGVEG_251870  | 13 kDa   | 6  | NR-20731 |
| histone H3                                                    | TGVEG_chrVIIb:1822729-1823139(+)  | 136   | TGVEG_261240  | 15 kDa   | 10 | NR-20730 |
| histone H3.3                                                  | TGME49_chrXII:1637998-1638408(+)  | 136   | TGME49_218260 | 15 kDa   | 3  | NR-362   |

|                                                            |                                   |      |               |         |   |          |
|------------------------------------------------------------|-----------------------------------|------|---------------|---------|---|----------|
| histone H4                                                 | TGVEG_chrVI:511313-511624(-)      | 103  | TGVEG_239260  | 11 kDa  | 8 | NR-223   |
| histone H4                                                 | TGME49_chrVI:497127-497438(-)     | 103  | TGME49_239260 | 11 kDa  | 4 | NR-362   |
| histone lysine acetyltransferase GCN5-A                    | TGVEG_chrIII:1832302-1839096(+)   | 1186 | TGVEG_254555  | 128 kDa | 1 | NR-20730 |
| histone lysine methyltransferase SET1                      | TGVEG_chrX:1214638-1243630(+)     | 7555 | TGVEG_226810  | 803 kDa | 3 | NR-20734 |
| histone lysine methyltransferase SET1 (SET1)               | TGME49_chrX:1321918-1350882(+)    | 7551 | TGME49_226810 | 803 kDa | 2 | NR-362   |
| histone lysine-specific demethylase                        | TGVEG_chrVI:2025661-2042914(+)    | 3802 | TGVEG_242415  | 414 kDa | 2 | NR-223   |
| homeodomain-like domain protein                            | TGVEG_chrVIII:2474631-2482122(+)  | 1874 | TGVEG_233160  | 199 kDa | 1 | NR-44106 |
| homocysteine s-methyltransferase domain-containing protein | TGVEG_chrVIIIb:3870710-3875105(+) | 434  | TGVEG_257750  | 47 kDa  | 1 | NR-20730 |
| hypothetical protein                                       | TGVEG_chrVI:836714-840185(+)      | 956  | TGVEG_239670  | 104 kDa | 1 | NR-20730 |
| hypothetical protein                                       | TGVEG_chrXII:5191593-5200946(+)   | 1264 | TGVEG_250790  | 136 kDa | 1 | NR-20730 |
| hypothetical protein                                       | TGVEG_chrXII:6009223-6014641(+)   | 1311 | TGVEG_278600  | 142 kDa | 1 | NR-20730 |
| hypothetical protein                                       | TGVEG_chrIX:1895156-1899067(+)    | 1303 | TGVEG_264980  | 144 kDa | 2 | NR-20730 |
| hypothetical protein                                       | TGVEG_chrXI:2320533-2320943(-)    | 136  | TGVEG_311820  | 15 kDa  | 1 | NR-20730 |
| hypothetical protein                                       | TGVEG_chrX:3505732-3512465(-)     | 1588 | TGVEG_223760  | 169 kDa | 2 | NR-20730 |
| hypothetical protein                                       | TGVEG_chrVIII:5997291-6002450(+)  | 1719 | TGVEG_269210  | 182 kDa | 1 | NR-20730 |
| hypothetical protein                                       | TGVEG_chrV:73034-78848(-)         | 1899 | TGVEG_220132  | 201 kDa | 1 | NR-20730 |
| hypothetical protein                                       | TGVEG_chrVIII:454041-454790(-)    | 249  | TGVEG_229790B | 26 kDa  | 1 | NR-20730 |
| hypothetical protein                                       | TGVEG_chrVIII:4286701-4288458(+)  | 234  | TGVEG_271930  | 26 kDa  | 2 | NR-20730 |
| hypothetical protein                                       | TGVEG_chrXII:643074-654633(+)     | 2525 | TGVEG_219738  | 273 kDa | 1 | NR-20730 |
| hypothetical protein                                       | TGVEG_chrIX:225616-227233(+)      | 384  | TGVEG_279410  | 42 kDa  | 1 | NR-20730 |
| hypothetical protein                                       | TGVEG_chrV:865192-882503(+)       | 4983 | TGVEG_213300  | 539 kDa | 1 | NR-20730 |
| hypothetical protein                                       | TGVEG_chrVIII:4751724-4753744(+)  | 481  | TGVEG_271080  | 54 kDa  | 1 | NR-20730 |
| hypothetical protein                                       | TGVEG_chrIX:2284897-2287351(+)    | 787  | TGVEG_440440  | 78 kDa  | 2 | NR-20730 |
| hypothetical protein                                       | TGVEG_chrVIIIb:985451-989763(-)   | 803  | TGVEG_262850  | 88 kDa  | 2 | NR-20730 |
| hypothetical protein                                       | TGVEG_chrIII:309919-312552(+)     | 877  | TGVEG_275650  | 101 kDa | 1 | NR-20731 |
| hypothetical protein                                       | TGVEG_chrIX:3326759-3329572(+)    | 937  | TGVEG_289540  | 101 kDa | 2 | NR-20731 |
| hypothetical protein                                       | TGVEG_chrVIII:5516892-5520411(-)  | 944  | TGVEG_269950  | 105 kDa | 4 | NR-20731 |
| hypothetical protein                                       | TGVEG_chrVIII:657054-657924(-)    | 142  | TGVEG_230160  | 16 kDa  | 9 | NR-20731 |
| hypothetical protein                                       | TGVEG_chrXII:5110301-5117389(+)   | 1509 | TGVEG_250700  | 161 kDa | 1 | NR-20731 |
| hypothetical protein                                       | TGVEG_chrIII:776115-781437(-)     | 1519 | TGVEG_253140  | 165 kDa | 2 | NR-20731 |
| hypothetical protein                                       | TGVEG_chrVIII:4235665-4244835(+)  | 1541 | TGVEG_272000  | 169 kDa | 1 | NR-20731 |
| hypothetical protein                                       | TGVEG_chrIX:2592099-2606121(+)    | 1816 | TGVEG_288460  | 198 kDa | 1 | NR-20731 |
| hypothetical protein                                       | TGVEG_chrVIII:983288-993623(+)    | 1963 | TGVEG_230700  | 213 kDa | 2 | NR-20731 |
| hypothetical protein                                       | TGVEG_chrIV:1838598-1846426(-)    | 2240 | TGVEG_211340  | 240 kDa | 1 | NR-20731 |

|                      |                                  |      |               |         |   |          |
|----------------------|----------------------------------|------|---------------|---------|---|----------|
| hypothetical protein | TGVEG_chrVIIb:1715820-1726036(+) | 2390 | TGVEG_261490  | 262 kDa | 1 | NR-20731 |
| hypothetical protein | TGVEG_chrVIIa:3850811-3860016(+) | 2624 | TGVEG_201820  | 274 kDa | 1 | NR-20731 |
| hypothetical protein | TGVEG_chrVIIb:2547209-2554918(-) | 2569 | TGVEG_260000  | 280 kDa | 2 | NR-20731 |
| hypothetical protein | TGVEG_chrV:2558595-2566803(+)    | 2574 | TGVEG_285140  | 282 kDa | 2 | NR-20731 |
| hypothetical protein | TGVEG_chrVIII:1999431-2001382(+) | 275  | TGVEG_232280  | 30 kDa  | 2 | NR-20731 |
| hypothetical protein | TGVEG_chrVIII:2648108-2667270(+) | 3806 | TGVEG_233430  | 411 kDa | 1 | NR-20731 |
| hypothetical protein | TGVEG_chrV:3044690-3046149(-)    | 376  | TGVEG_283540  | 42 kDa  | 2 | NR-20731 |
| hypothetical protein | TGVEG_chrX:44431-45780(-)        | 449  | TGVEG_228760  | 49 kDa  | 2 | NR-20731 |
| hypothetical protein | TGVEG_chrIX:6234740-6236747(-)   | 440  | TGVEG_306580  | 49 kDa  | 1 | NR-20731 |
| hypothetical protein | TGVEG_chrVIII:4177521-4195001(-) | 4618 | TGVEG_272155  | 494 kDa | 1 | NR-20731 |
| hypothetical protein | TGVEG_chrXII:720511-736126(-)    | 4948 | TGVEG_325100  | 551 kDa | 2 | NR-20731 |
| hypothetical protein | TGVEG_chrX:6755726-6758048(+)    | 578  | TGVEG_215220  | 63 kDa  | 3 | NR-20731 |
| hypothetical protein | TGVEG_chrVIIa:3717929-3750270(-) | 7954 | TGVEG_202070  | 848 kDa | 1 | NR-20731 |
| hypothetical protein | TGVEG_chrVI:2855848-2859244(+)   | 845  | TGVEG_243780  | 91 kDa  | 1 | NR-20731 |
| hypothetical protein | TGVEG_chrIX:3278033-3283397(+)   | 921  | TGVEG_289380  | 100 kDa | 1 | NR-20734 |
| hypothetical protein | TGVEG_chrIX:1208730-1216233(+)   | 924  | TGVEG_266372  | 103 kDa | 1 | NR-20734 |
| hypothetical protein | TGVEG_chrX:6577784-6581423(-)    | 1110 | TGVEG_214980  | 117 kDa | 1 | NR-20734 |
| hypothetical protein | TGVEG_chrVIIb:2028768-2035613(+) | 1227 | TGVEG_260830  | 134 kDa | 2 | NR-20734 |
| hypothetical protein | TGVEG_chrVI:546608-552418(+)     | 1186 | TGVEG_239300A | 135 kDa | 1 | NR-20734 |
| hypothetical protein | TGVEG_chrVI:327553-333450(-)     | 1591 | TGVEG_238930  | 175 kDa | 9 | NR-20734 |
| hypothetical protein | TGVEG_chrX:5975866-5980782(+)    | 1638 | TGVEG_214130  | 176 kDa | 1 | NR-20734 |
| hypothetical protein | TGVEG_chrX:5986019-5993598(+)    | 1975 | TGVEG_214140  | 205 kDa | 1 | NR-20734 |
| hypothetical protein | TGVEG_chrIV:203140-220485(+)     | 2072 | TGVEG_320592  | 222 kDa | 1 | NR-20734 |
| hypothetical protein | TGVEG_chrII:1039060-1047356(-)   | 2331 | TGVEG_222330  | 257 kDa | 1 | NR-20734 |
| hypothetical protein | TGVEG_chrXI:2974543-2983755(-)   | 2397 | TGVEG_312875  | 260 kDa | 1 | NR-20734 |
| hypothetical protein | TGVEG_chrVIIb:1638376-1640583(-) | 254  | TGVEG_261620  | 30 kDa  | 1 | NR-20734 |
| hypothetical protein | TGVEG_chrV:2789554-2805526(-)    | 2849 | TGVEG_284040  | 312 kDa | 1 | NR-20734 |
| hypothetical protein | TGVEG_chrXI:3453237-3463625(-)   | 2946 | TGVEG_313495  | 319 kDa | 1 | NR-20734 |
| hypothetical protein | TGVEG_chrVIII:2932618-2942067(+) | 3149 | TGVEG_233960  | 345 kDa | 1 | NR-20734 |
| hypothetical protein | TGVEG_chrXI:4433379-4446713(+)   | 3263 | TGVEG_314920  | 345 kDa | 1 | NR-20734 |
| hypothetical protein | TGVEG_chrXI:1712397-1729464(+)   | 3415 | TGVEG_310970  | 370 kDa | 2 | NR-20734 |
| hypothetical protein | TGVEG_chrVIII:5944135-5961658(-) | 4668 | TGVEG_269290  | 503 kDa | 1 | NR-20734 |
| hypothetical protein | TGVEG_chrII:1449885-1452149(-)   | 754  | TGVEG_223095  | 82 kDa  | 1 | NR-20734 |
| hypothetical protein | TGVEG_chrVI:1048813-1051344(+)   | 843  | TGVEG_240060  | 89 kDa  | 2 | NR-20734 |
| hypothetical protein | TGVEG_chrIII:2091542-2094883(+)  | 1113 | TGVEG_299270  | 119 kDa | 2 | NR-223   |
| hypothetical protein | TGVEG_chrVIIb:81928-85485(-)     | 1185 | TGVEG_264210  | 124 kDa | 1 | NR-223   |

|                      |                                   |      |               |         |    |        |
|----------------------|-----------------------------------|------|---------------|---------|----|--------|
| hypothetical protein | TGVEG_chrVIII:5660622-5665054(-)  | 1139 | TGVEG_269720  | 126 kDa | 1  | NR-223 |
| hypothetical protein | TGVEG_chrVIII:4279083-4284027(+)  | 1162 | TGVEG_271950  | 126 kDa | 1  | NR-223 |
| hypothetical protein | TGVEG_chrXII:3974351-3980235(+)   | 1767 | TGVEG_248570  | 198 kDa | 2  | NR-223 |
| hypothetical protein | TGVEG_chrXI:1547617-1558688(-)    | 2041 | TGVEG_310720  | 216 kDa | 2  | NR-223 |
| hypothetical protein | TGVEG_chrIII:1841101-1853869(-)   | 2002 | TGVEG_254570  | 225 kDa | 1  | NR-223 |
| hypothetical protein | TGVEG_chrVIII:4394279-4410849(+)  | 2022 | TGVEG_271770  | 225 kDa | 1  | NR-223 |
| hypothetical protein | TGVEG_chrVIIa:1000907-1002603(-)  | 207  | TGVEG_206480  | 23 kDa  | 2  | NR-223 |
| hypothetical protein | TGVEG_chrVIIb:2667293-2676304(-)  | 2126 | TGVEG_259860  | 230 kDa | 3  | NR-223 |
| hypothetical protein | TGVEG_chrXII:1964596-1976505(-)   | 2234 | TGVEG_217680  | 246 kDa | 3  | NR-223 |
| hypothetical protein | TGVEG_chrIX:636498-637835(+)      | 230  | TGVEG_267500  | 26 kDa  | 2  | NR-223 |
| hypothetical protein | TGVEG_chrII:1385576-1387131(-)    | 239  | TGVEG_223040  | 27 kDa  | 1  | NR-223 |
| hypothetical protein | TGVEG_chrX:6883990-6888378(-)     | 244  | TGVEG_215430  | 28 kDa  | 1  | NR-223 |
| hypothetical protein | KI544577:2927-4371(+)             | 269  | TGVEG_220950  | 28 kDa  | 7  | NR-223 |
| hypothetical protein | TGVEG_chrX:1661567-1664184(+)     | 276  | TGVEG_226245  | 30 kDa  | 2  | NR-223 |
| hypothetical protein | TGVEG_chrXI:3342055-3343786(+)    | 274  | TGVEG_313380  | 32 kDa  | 2  | NR-223 |
| hypothetical protein | KI544730:145-1683(-)              | 320  | TGVEG_442370  | 34 kDa  | 17 | NR-223 |
| hypothetical protein | TGVEG_chrVI:2384113-2402436(+)    | 3150 | TGVEG_242890  | 343 kDa | 1  | NR-223 |
| hypothetical protein | TGVEG_chrXI:800844-801791(-)      | 315  | TGVEG_309760  | 35 kDa  | 1  | NR-223 |
| hypothetical protein | TGVEG_chrX:4241085-4242556(+)     | 347  | TGVEG_234380  | 39 kDa  | 4  | NR-223 |
| hypothetical protein | TGVEG_chrVIIb:4733014-4747177(-)  | 3696 | TGVEG_255700  | 404 kDa | 1  | NR-223 |
| hypothetical protein | TGVEG_chrXI:593025-607263(-)      | 3800 | TGVEG_309250  | 407 kDa | 1  | NR-223 |
| hypothetical protein | TGVEG_chrVIII:4675187-4699621(+)  | 5655 | TGVEG_271145  | 608 kDa | 1  | NR-223 |
| hypothetical protein | TGVEG_chrVIIa:706780-727510(+)    | 6038 | TGVEG_304720  | 649 kDa | 1  | NR-223 |
| hypothetical protein | TGVEG_chrXI:312500-316083(-)      | 654  | TGVEG_308860  | 70 kDa  | 1  | NR-223 |
| hypothetical protein | TGVEG_chrVIIa:2810381-2820253(-)  | 666  | TGVEG_203160  | 75 kDa  | 2  | NR-223 |
| hypothetical protein | TGVEG_chrIV:2369636-2372766(-)    | 695  | TGVEG_301240  | 75 kDa  | 1  | NR-223 |
| hypothetical protein | TGVEG_chrVIII:6274482-6282381(+)  | 767  | TGVEG_268835  | 87 kDa  | 1  | NR-223 |
| hypothetical protein | TGVEG_chrX:6194777-6198592(-)     | 845  | TGVEG_214370  | 91 kDa  | 1  | NR-223 |
| hypothetical protein | TGVEG_chrX:2629120-2665174(+)     | 8643 | TGVEG_224870  | 931 kDa | 1  | NR-223 |
| hypothetical protein | TGME49_chrIX:3291692-3295474(+)   | 937  | TGME49_289540 | 101 kDa | 3  | NR-225 |
| hypothetical protein | TGME49_chrXII:1716866-1723890(-)  | 918  | TGME49_218188 | 102 kDa | 1  | NR-225 |
| hypothetical protein | TGME49_chrVIII:5502774-5506290(-) | 944  | TGME49_269950 | 105 kDa | 2  | NR-225 |
| hypothetical protein | TGME49_chrV:1775544-1778411(-)    | 955  | TGME49_286580 | 107 kDa | 6  | NR-225 |
| hypothetical protein | TGME49_chrXI:2671170-2676362(-)   | 1086 | TGME49_312420 | 118 kDa | 2  | NR-225 |
| hypothetical protein | TGME49_chrVIIb:1739611-1746545(-) | 1111 | TGME49_261450 | 119 kDa | 1  | NR-225 |
| hypothetical protein | TGME49_chrXII:5242184-5247719(+)  | 1156 | TGME49_250820 | 121 kDa | 2  | NR-225 |

|                      |                                   |      |               |         |   |        |
|----------------------|-----------------------------------|------|---------------|---------|---|--------|
| hypothetical protein | TGME49_chrVIII:721426-733432(-)   | 1254 | TGME49_230350 | 139 kDa | 1 | NR-225 |
| hypothetical protein | TGME49_chrVI:3432508-3439482(+)   | 1332 | TGME49_244660 | 143 kDa | 1 | NR-225 |
| hypothetical protein | TGME49_chrIV:97671-101804(+)      | 1377 | TGME49_320750 | 149 kDa | 2 | NR-225 |
| hypothetical protein | TGME49_chrX:3225503-3238161(-)    | 1356 | TGME49_224210 | 150 kDa | 1 | NR-225 |
| hypothetical protein | TGME49_chrXI:4855798-4856274(+)   | 158  | TGME49_315610 | 16 kDa  | 2 | NR-225 |
| hypothetical protein | TGME49_chrX:3602985-3609718(-)    | 1588 | TGME49_223760 | 169 kDa | 1 | NR-225 |
| hypothetical protein | TGME49_chrX:2697253-2698033(-)    | 149  | TGME49_224905 | 17 kDa  | 1 | NR-225 |
| hypothetical protein | TGME49_chrVIII:6092926-6102026(+) | 1572 | TGME49_269060 | 171 kDa | 2 | NR-225 |
| hypothetical protein | TGME49_chrXII:1867132-1875006(+)  | 1589 | TGME49_217480 | 175 kDa | 2 | NR-225 |
| hypothetical protein | TGME49_chrVIII:5982326-5987566(+) | 1746 | TGME49_269210 | 185 kDa | 1 | NR-225 |
| hypothetical protein | TGME49_chrVIII:2140644-2145983(+) | 1779 | TGME49_232530 | 193 kDa | 1 | NR-225 |
| hypothetical protein | TGME49_chrIII:880824-903021(+)    | 1981 | TGME49_253370 | 217 kDa | 1 | NR-225 |
| hypothetical protein | TGME49_chrIV:1959475-1961940(-)   | 191  | TGME49_211030 | 22 kDa  | 3 | NR-225 |
| hypothetical protein | TGME49_chrXII:3393841-3394482(-)  | 213  | TGME49_247530 | 23 kDa  | 1 | NR-225 |
| hypothetical protein | TGME49_chrIII:1380887-1390283(+)  | 2197 | TGME49_253990 | 231 kDa | 2 | NR-225 |
| hypothetical protein | TGME49_chrVI:181594-189527(+)     | 2122 | TGME49_238390 | 232 kDa | 1 | NR-225 |
| hypothetical protein | TGME49_chrX:5564293-5565313(-)    | 218  | TGME49_236890 | 25 kDa  | 1 | NR-225 |
| hypothetical protein | TGME49_chrVIIb:1700648-1710832(+) | 2356 | TGME49_261490 | 258 kDa | 1 | NR-225 |
| hypothetical protein | TGME49_chrVIIb:4916993-4926347(+) | 2496 | TGME49_255300 | 265 kDa | 1 | NR-225 |
| hypothetical protein | TGME49_chrX:2486271-2491280(+)    | 242  | TGME49_225120 | 27 kDa  | 1 | NR-225 |
| hypothetical protein | TGME49_chrXII:3390730-3391500(-)  | 256  | TGME49_247520 | 27 kDa  | 4 | NR-225 |
| hypothetical protein | TGME49_chrV:205015-216424(-)      | 2590 | TGME49_220208 | 281 kDa | 1 | NR-225 |
| hypothetical protein | TGME49_chrII:1429798-1440360(-)   | 2909 | TGME49_223080 | 307 kDa | 1 | NR-225 |
| hypothetical protein | TGME49_chrIX:6239551-6241640(-)   | 286  | TGME49_306650 | 32 kDa  | 1 | NR-225 |
| hypothetical protein | TGME49_chrXI:2910721-2923663(+)   | 2966 | TGME49_312700 | 322 kDa | 2 | NR-225 |
| hypothetical protein | TGME49_chrIX:2291617-2302605(+)   | 2983 | TGME49_288000 | 328 kDa | 1 | NR-225 |
| hypothetical protein | TGME49_chrXII:2180818-2190517(+)  | 3095 | TGME49_217860 | 329 kDa | 2 | NR-225 |
| hypothetical protein | TGME49_chrVIIa:2618800-2619792(-) | 330  | TGME49_203290 | 36 kDa  | 2 | NR-225 |
| hypothetical protein | TGME49_chrIX:395802-396824(+)     | 340  | TGME49_267740 | 37 kDa  | 2 | NR-225 |
| hypothetical protein | TGME49_chrVIIb:638309-640338(-)   | 403  | TGME49_263320 | 42 kDa  | 1 | NR-225 |
| hypothetical protein | TGME49_chrXII:2863310-2866992(+)  | 383  | TGME49_246580 | 43 kDa  | 1 | NR-225 |
| hypothetical protein | TGME49_chrX:609073-639378(+)      | 4084 | TGME49_228070 | 442 kDa | 2 | NR-225 |
| hypothetical protein | TGME49_chrIII:50750-64177(+)      | 4184 | TGME49_276200 | 449 kDa | 1 | NR-225 |
| hypothetical protein | TGME49_chrXI:5210057-5211241(-)   | 394  | TGME49_316250 | 45 kDa  | 3 | NR-225 |
| hypothetical protein | TGME49_chrV:839164-840522(-)      | 452  | TGME49_213067 | 50 kDa  | 2 | NR-225 |
| hypothetical protein | TGME49_chrVIII:5929120-5946657(-) | 4668 | TGME49_269290 | 503 kDa | 1 | NR-225 |

|                      |                                   |       |               |          |   |        |
|----------------------|-----------------------------------|-------|---------------|----------|---|--------|
| hypothetical protein | TGME49_chrIX:1123719-1150129(+)   | 4519  | TGME49_266435 | 508 kDa  | 1 | NR-225 |
| hypothetical protein | TGME49_chrVIII:1061637-1064135(+) | 476   | TGME49_230850 | 51 kDa   | 2 | NR-225 |
| hypothetical protein | TGME49_chrIX:4841023-4842462(-)   | 479   | TGME49_210370 | 52 kDa   | 2 | NR-225 |
| hypothetical protein | TGME49_chrIX:2363380-2379419(-)   | 5015  | TGME49_288190 | 536 kDa  | 1 | NR-225 |
| hypothetical protein | TGME49_chrXII:749487-765567(-)    | 4900  | TGME49_219660 | 543 kDa  | 1 | NR-225 |
| hypothetical protein | TGME49_chrIX:4194366-4223727(-)   | 5354  | TGME49_291180 | 574 kDa  | 3 | NR-225 |
| hypothetical protein | TGME49_chrII:1516889-1518752(-)   | 519   | TGME49_297070 | 58 kDa   | 2 | NR-225 |
| hypothetical protein | TGME49_chrVIII:5731763-5733866(-) | 577   | TGME49_269630 | 61 kDa   | 1 | NR-225 |
| hypothetical protein | TGME49_chrXI:2459938-2463885(+)   | 567   | TGME49_312150 | 61 kDa   | 1 | NR-225 |
| hypothetical protein | TGME49_chrIX:2006823-2009630(-)   | 628   | TGME49_264805 | 72 kDa   | 1 | NR-225 |
| hypothetical protein | TGME49_chrX:3932540-3937693(+)    | 683   | TGME49_212300 | 76 kDa   | 4 | NR-225 |
| hypothetical protein | TGME49_chrVIII:6293958-6318640(-) | 7354  | TGME49_268780 | 776 kDa  | 1 | NR-225 |
| hypothetical protein | TGME49_chrVI:731121-734754(+)     | 700   | TGME49_239520 | 78 kDa   | 4 | NR-225 |
| hypothetical protein | TGME49_chrVI:391772-394090(-)     | 772   | TGME49_239010 | 80 kDa   | 2 | NR-225 |
| hypothetical protein | TGME49_chrIII:1758819-1763403(+)  | 732   | TGME49_254470 | 80 kDa   | 3 | NR-225 |
| hypothetical protein | TGME49_chrII:1444629-1446893(-)   | 754   | TGME49_223095 | 82 kDa   | 1 | NR-225 |
| hypothetical protein | TGME49_chrXI:6208574-6238500(-)   | 7450  | TGME49_216335 | 820 kDa  | 2 | NR-225 |
| hypothetical protein | TGME49_chrVIIa:3523795-3527924(-) | 793   | TGME49_202200 | 87 kDa   | 1 | NR-225 |
| hypothetical protein | TGME49_chrVI:1035230-1037761(+)   | 843   | TGME49_240060 | 89 kDa   | 3 | NR-225 |
| hypothetical protein | TGME49_chrIV:2121505-2154366(+)   | 8642  | TGME49_210700 | 927 kDa  | 2 | NR-225 |
| hypothetical protein | TGME49_chrXII:2790740-2796228(-)  | 829   | TGME49_246475 | 94 kDa   | 1 | NR-225 |
| hypothetical protein | TGME49_chrXI:751293-759036(+)     | 960   | TGME49_309600 | 107 kDa  | 2 | NR-362 |
| hypothetical protein | TGME49_chrVIII:1808775-1843412(-) | 10329 | TGME49_232080 | 1101 kDa | 1 | NR-362 |
| hypothetical protein | TGME49_chrVIII:5868237-5871936(+) | 1067  | TGME49_269365 | 113 kDa  | 1 | NR-362 |
| hypothetical protein | TGME49_chrIII:1950810-1956678(-)  | 1221  | TGME49_254830 | 131 kDa  | 1 | NR-362 |
| hypothetical protein | TGME49_chrX:2065975-2104376(+)    | 12206 | TGME49_225745 | 1320 kDa | 1 | NR-362 |
| hypothetical protein | TGME49_chrIX:1983821-1993532(+)   | 1252  | TGME49_264830 | 137 kDa  | 1 | NR-362 |
| hypothetical protein | TGME49_chrVI:531604-538313(+)     | 1232  | TGME49_239300 | 139 kDa  | 1 | NR-362 |
| hypothetical protein | TGME49_chrlb:1428389-1432216(+)   | 1275  | TGME49_209755 | 140 kDa  | 1 | NR-362 |
| hypothetical protein | TGME49_chrVIII:2947108-2951208(-) | 1366  | TGME49_274180 | 141 kDa  | 1 | NR-362 |
| hypothetical protein | TGME49_chrXII:2008412-2013673(-)  | 1327  | TGME49_217692 | 144 kDa  | 1 | NR-362 |
| hypothetical protein | TGME49_chrXI:3527394-3573580(-)   | 13455 | TGME49_313630 | 1452 kDa | 1 | NR-362 |
| hypothetical protein | TGME49_chrIV:1362993-1373084(-)   | 1434  | TGME49_318400 | 156 kDa  | 2 | NR-362 |
| hypothetical protein | TGME49_chrVIII:650426-651296(-)   | 142   | TGME49_230160 | 16 kDa   | 3 | NR-362 |
| hypothetical protein | TGME49_chrXI:2731942-2742952(-)   | 1557  | TGME49_312500 | 170 kDa  | 2 | NR-362 |
| hypothetical protein | TGME49_chrIX:2434121-2438905(+)   | 1594  | TGME49_288280 | 173 kDa  | 1 | NR-362 |

|                      |                                   |      |               |         |   |          |
|----------------------|-----------------------------------|------|---------------|---------|---|----------|
| hypothetical protein | TGME49_chrVIII:6824629-6825189(+) | 186  | TGME49_200360 | 20 kDa  | 2 | NR-362   |
| hypothetical protein | TGME49_chrX:1880461-1888832(-)    | 1842 | TGME49_225980 | 201 kDa | 1 | NR-362   |
| hypothetical protein | TGME49_chrII:498311-506196(-)     | 1940 | TGME49_221630 | 210 kDa | 1 | NR-362   |
| hypothetical protein | TGME49_chrXI:6494435-6495067(+)   | 210  | TGME49_215980 | 24 kDa  | 5 | NR-362   |
| hypothetical protein | TGME49_chrIX:3558050-3559653(+)   | 232  | TGME49_289970 | 24 kDa  | 2 | NR-362   |
| hypothetical protein | TGME49_chrXII:1990538-2002447(-)  | 2234 | TGME49_217680 | 246 kDa | 3 | NR-362   |
| hypothetical protein | TGME49_chrX:4234352-4250098(-)    | 2276 | TGME49_234250 | 249 kDa | 1 | NR-362   |
| hypothetical protein | TGME49_chrVIIb:3413789-3423357(+) | 2336 | TGME49_258450 | 249 kDa | 1 | NR-362   |
| hypothetical protein | TGME49_chrX:235782-244473(-)      | 2497 | TGME49_228670 | 259 kDa | 1 | NR-362   |
| hypothetical protein | TGME49_chrIX:610582-611919(+)     | 230  | TGME49_267500 | 26 kDa  | 3 | NR-362   |
| hypothetical protein | TGME49_chrII:2036460-2039203(-)   | 266  | TGME49_297810 | 30 kDa  | 2 | NR-362   |
| hypothetical protein | TGME49_chrXI:3178262-3187570(-)   | 3102 | TGME49_313210 | 334 kDa | 1 | NR-362   |
| hypothetical protein | TGME49_chrXI:792237-793184(-)     | 315  | TGME49_309760 | 35 kDa  | 1 | NR-362   |
| hypothetical protein | TGME49_chrVIII:4536352-4546923(-) | 3523 | TGME49_271370 | 379 kDa | 1 | NR-362   |
| hypothetical protein | TGME49_chrX:1453772-1473117(+)    | 3735 | TGME49_226660 | 390 kDa | 2 | NR-362   |
| hypothetical protein | TGME49_chrXII:3959491-3983779(-)  | 3620 | TGME49_248540 | 390 kDa | 1 | NR-362   |
| hypothetical protein | TGME49_chrX:1675489-1676625(+)    | 378  | TGME49_226380 | 43 kDa  | 4 | NR-362   |
| hypothetical protein | TGME49_chrVIII:3105984-3124720(+) | 3903 | TGME49_274000 | 438 kDa | 2 | NR-362   |
| hypothetical protein | TGME49_chrV:3074734-3088088(+)    | 4210 | TGME49_283550 | 456 kDa | 1 | NR-362   |
| hypothetical protein | TGME49_chrII:91398-94253(+)       | 435  | TGME49_279100 | 48 kDa  | 5 | NR-362   |
| hypothetical protein | TGME49_chrX:2977229-2998629(-)    | 4798 | TGME49_224540 | 497 kDa | 1 | NR-362   |
| hypothetical protein | TGME49_chrXI:1880862-1900195(+)   | 4690 | TGME49_311230 | 505 kDa | 2 | NR-362   |
| hypothetical protein | TGME49_chrX:5034378-5037125(+)    | 558  | TGME49_235670 | 60 kDa  | 1 | NR-362   |
| hypothetical protein | TGME49_chrVIIa:1307040-1330896(+) | 5843 | TGME49_205562 | 627 kDa | 1 | NR-362   |
| hypothetical protein | TGME49_chrVIIb:137834-157243(-)   | 6085 | TGME49_264140 | 653 kDa | 1 | NR-362   |
| hypothetical protein | TGME49_chrVI:593375-614460(-)     | 6052 | TGME49_239885 | 656 kDa | 1 | NR-362   |
| hypothetical protein | TGME49_chrX:6825368-6827843(+)    | 629  | TGME49_215220 | 69 kDa  | 3 | NR-362   |
| hypothetical protein | TGME49_chrXI:5206592-5208661(+)   | 689  | TGME49_316240 | 75 kDa  | 2 | NR-362   |
| hypothetical protein | TGME49_chrVIIb:909930-912343(-)   | 681  | TGME49_262935 | 77 kDa  | 1 | NR-362   |
| hypothetical protein | TGME49_chrVIIa:3630367-3663316(-) | 7892 | TGME49_202070 | 842 kDa | 2 | NR-362   |
| hypothetical protein | TGME49_chrX:2727980-2763964(+)    | 8611 | TGME49_224870 | 927 kDa | 2 | NR-362   |
| hypothetical protein | TGME49_chrXII:4972727-4977510(-)  | 838  | TGME49_249990 | 93 kDa  | 6 | NR-362   |
| hypothetical protein | TGME49_chrVIII:5680835-5683996(+) | 865  | TGME49_269690 | 94 kDa  | 3 | NR-362   |
| hypothetical protein | TGME49_chrIX:5725096-5755268(+)   | 8847 | TGME49_306020 | 953 kDa | 1 | NR-362   |
| hypothetical protein | TGME49_chrVIIa:1871198-1875691(-) | 877  | TGME49_204340 | 97 kDa  | 2 | NR-362   |
| hypothetical protein | TGVEG_chrXI:759894-767633(+)      | 960  | TGVEG_309600  | 107 kDa | 2 | NR-44106 |



|                                                                     |                                  |       |               |          |   |          |
|---------------------------------------------------------------------|----------------------------------|-------|---------------|----------|---|----------|
| hypothetical protein                                                | TGVEG_chrXI:4745168-4756070(-)   | 1008  | TGVEG_315460  | 108 kDa  | 1 | NR-44106 |
| hypothetical protein                                                | TGVEG_chrVIIb:4143888-4147139(-) | 1083  | TGVEG_257330  | 117 kDa  | 1 | NR-44106 |
| hypothetical protein                                                | TGVEG_chrVIII:2683458-2688840(+) | 1179  | TGVEG_233490  | 126 kDa  | 1 | NR-44106 |
| hypothetical protein                                                | TGVEG_chrXII:3866730-3906820(-)  | 11926 | TGVEG_248510  | 1295 kDa | 1 | NR-44106 |
| hypothetical protein                                                | TGVEG_chrIX:1660168-1663869(-)   | 1233  | TGVEG_265280  | 133 kDa  | 1 | NR-44106 |
| hypothetical protein                                                | TGVEG_chrVIII:610981-615959(-)   | 1256  | TGVEG_230110  | 136 kDa  | 1 | NR-44106 |
| hypothetical protein                                                | TGVEG_chrIV:1386065-1390517(+)   | 1278  | TGVEG_318390  | 138 kDa  | 1 | NR-44106 |
| hypothetical protein                                                | TGVEG_chrV:673683-684142(-)      | 1400  | TGVEG_212940  | 153 kDa  | 1 | NR-44106 |
| hypothetical protein                                                | TGVEG_chrXI:4720681-4726145(+)   | 1478  | TGVEG_315420  | 164 kDa  | 1 | NR-44106 |
| hypothetical protein                                                | TGVEG_chrla:45623-51562(-)       | 1979  | TGVEG_292950  | 211 kDa  | 1 | NR-44106 |
| hypothetical protein                                                | TGVEG_chrX:6500246-6509344(+)    | 2286  | TGVEG_214900  | 247 kDa  | 1 | NR-44106 |
| hypothetical protein                                                | TGVEG_chrIV:1944986-1957183(-)   | 2539  | TGVEG_211150  | 273 kDa  | 1 | NR-44106 |
| hypothetical protein                                                | TGVEG_chrVI:2045431-2061447(-)   | 3118  | TGVEG_242435  | 331 kDa  | 1 | NR-44106 |
| hypothetical protein                                                | TGVEG_chrla:134295-144472(-)     | 3263  | TGVEG_293170  | 360 kDa  | 1 | NR-44106 |
| hypothetical protein                                                | TGVEG_chrX:1346501-1365853(+)    | 3736  | TGVEG_226660  | 390 kDa  | 1 | NR-44106 |
| hypothetical protein                                                | TGVEG_chrlI:205421-222056(+)     | 4035  | TGVEG_221280  | 438 kDa  | 1 | NR-44106 |
| hypothetical protein                                                | TGVEG_chrVIII:3114746-3133496(+) | 3903  | TGVEG_274000  | 438 kDa  | 1 | NR-44106 |
| hypothetical protein                                                | TGVEG_chrVI:1758329-1774422(-)   | 4533  | TGVEG_241850  | 479 kDa  | 2 | NR-44106 |
| hypothetical protein                                                | TGVEG_chrXII:2691762-2709179(+)  | 4885  | TGVEG_246190  | 530 kDa  | 1 | NR-44106 |
| hypothetical protein                                                | TGVEG_chrXII:6234636-6262269(-)  | 5632  | TGVEG_278205  | 613 kDa  | 2 | NR-44106 |
| hypothetical protein                                                | TGVEG_chrvIIa:1377068-1400940(+) | 5847  | TGVEG_205562  | 627 kDa  | 1 | NR-44106 |
| hypothetical protein                                                | TGVEG_chrVIII:1412455-1416784(+) | 571   | TGVEG_231410  | 65 kDa   | 1 | NR-44106 |
| hypothetical protein                                                | TGVEG_chrX:5686667-5692132(+)    | 715   | TGVEG_237170  | 79 kDa   | 1 | NR-44106 |
| IMP dehydrogenasa                                                   | TGVEG_chrVIII:2431121-2436278(+) | 551   | TGVEG_233110  | 59 kDa   | 2 | NR-20731 |
| inner membrane complex protein IMC2A                                | TGVEG_chrX:411345-417155(-)      | 1596  | TGVEG_228170  | 182 kDa  | 7 | NR-20731 |
| inner membrane complex protein IMC2A (IMC2A)                        | TGME49_chrX:520228-525722(-)     | 1491  | TGME49_228170 | 171 kDa  | 4 | NR-362   |
| inorganic anion transporter, sulfate permease (SulP) family protein | TGVEG_chrVIII:2744263-2753515(+) | 1497  | TGVEG_233710  | 159 kDa  | 1 | NR-20730 |
| isocitrate dehydrogenase                                            | TGVEG_chrXI:3144837-3150720(-)   | 621   | TGVEG_313140  | 68 kDa   | 3 | NR-223   |
| isocitrate dehydrogenase                                            | TGME49_chrXI:3132733-3138618(-)  | 621   | TGME49_313140 | 68 kDa   | 2 | NR-362   |
| KH domain protein                                                   | TGVEG_chrVI:1685263-1689481(+)   | 1275  | TGVEG_241170  | 140 kDa  | 2 | NR-223   |
| kinesin motor domain-containing protein                             | TGVEG_chrIV:769202-776061(+)     | 1317  | TGVEG_319710  | 144 kDa  | 1 | NR-20731 |
| kinesin motor domain-containing protein                             | TGVEG_chrlb:190736-202568(+)     | 825   | TGVEG_207665  | 93 kDa   | 1 | NR-20731 |
| KRUF family protein                                                 | TGVEG_chrIX:4771408-4775618(+)   | 843   | TGVEG_210600  | 91 kDa   | 2 | NR-20734 |
| lactate dehydrogenase LDH1                                          | TGVEG_chrVIII:2034710-2036237(+) | 329   | TGVEG_232350  | 36 kDa   | 9 | NR-223   |

|                                                                |                                   |      |               |         |    |          |
|----------------------------------------------------------------|-----------------------------------|------|---------------|---------|----|----------|
| lactate dehydrogenase LDH1 (LDH1)                              | TGME49_chrVIII:2028207-2029734(+) | 329  | TGME49_232350 | 36 kDa  | 7  | NR-362   |
| lectin family protein                                          | TGVEG_chrVIIb:3097012-3101086(+)  | 646  | TGVEG_258950  | 70 kDa  | 3  | NR-20731 |
| leucine rich repeat-containing protein                         | TGVEG_chrV:2856417-2861968(-)     | 644  | TGVEG_283860  | 72 kDa  | 1  | NR-44106 |
| leucyl aminopeptidase LAP                                      | TGVEG_chrIX:3863611-3868736(+)    | 781  | TGVEG_290670  | 83 kDa  | 3  | NR-223   |
| leucyl aminopeptidase LAP (LAP)                                | TGME49_chrIX:3829311-3834438(+)   | 781  | TGME49_290670 | 83 kDa  | 3  | NR-225   |
| leucyl-tRNA synthetase                                         | TGVEG_chrIX:4572486-4583981(+)    | 1261 | TGVEG_292080  | 141 kDa | 3  | NR-20731 |
| lipoyltransferase and lipoate-protein ligase subfamily protein | TGVEG_chrVIII:4351082-4356226(+)  | 476  | TGVEG_271820  | 52 kDa  | 2  | NR-223   |
| Lon protease family protein                                    | TGME49_chrXI:254701-267259(+)     | 1498 | TGME49_308580 | 164 kDa | 2  | NR-362   |
| longevity-assurance protein (LAG1) domain-containing protein   | TGVEG_chrV:2974955-2978622(-)     | 342  | TGVEG_283710  | 40 kDa  | 1  | NR-20734 |
| MAG1                                                           | TGVEG_chrVIII:5325460-5326928(+)  | 452  | TGVEG_270240  | 49 kDa  | 5  | NR-223   |
| malate dehydrogenase MDH                                       | TGVEG_chrIV:1350527-1354359(-)    | 511  | TGVEG_318430  | 55 kDa  | 4  | NR-20734 |
| MCM2/3/5 family protein                                        | TGME49_chrVIII:5226099-5238119(-) | 1376 | TGME49_270450 | 146 kDa | 1  | NR-225   |
| membrane protein, putative                                     | TGME49_chrX:2105013-2107255(-)    | 128  | TGME49_225730 | 15 kDa  | 1  | NR-225   |
| methionyl-tRNA synthetase                                      | TGVEG_chrIX:3192799-3197173(+)    | 976  | TGVEG_289300  | 106 kDa | 1  | NR-20731 |
| methyltransferase domain-containing protein                    | TGVEG_chrXI:6076354-6080369(-)    | 532  | TGVEG_216560  | 59 kDa  | 1  | NR-20731 |
| MIC2-associated protein M2AP                                   | TGVEG_chrX:6532620-6534805(+)     | 330  | TGVEG_214940  | 35 kDa  | 2  | NR-20731 |
| MIC2-associated protein M2AP                                   | TGME49_chrX:6604937-6607564(+)    | 330  | TGME49_214940 | 35 kDa  | 2  | NR-225   |
| microneme protein MIC1 (MIC1)                                  | TGME49_chrIX:4395345-4397688(-)   | 456  | TGME49_291890 | 49 kDa  | 2  | NR-225   |
| microneme protein MIC10 (MIC10)                                | TGME49_chrXII:5143982-5144578(+)  | 198  | TGME49_250710 | 23 kDa  | 12 | NR-225   |
| microneme protein MIC11 (MIC11)                                | TGME49_chrVIIa:1731514-1732656(-) | 204  | TGME49_204530 | 22 kDa  | 2  | NR-362   |
| microneme protein MIC2                                         | TGVEG_chrVIIa:3881171-3884435(-)  | 769  | TGVEG_201780  | 83 kDa  | 2  | NR-20731 |
| microneme protein MIC2 (MIC2)                                  | TGME49_chrVIIa:3794121-3797385(-) | 769  | TGME49_201780 | 83 kDa  | 1  | NR-225   |
| microneme protein MIC3 (MIC3)                                  | TGME49_chrIV:912578-913851(+)     | 383  | TGME49_319560 | 41 kDa  | 1  | NR-362   |
| MIF4G domain-containing protein                                | TGVEG_chrIII:2056710-2072447(+)   | 3756 | TGVEG_254940  | 385 kDa | 1  | NR-20730 |
| MIF4G domain-containing protein                                | TGME49_chrIII:2047649-2063580(+)  | 3822 | TGME49_254940 | 392 kDa | 1  | NR-225   |
| mitotic checkpoint protein, BUB3 family protein                | TGME49_chrXII:2289561-2294016(+)  | 332  | TGME49_245470 | 37 kDa  | 2  | NR-225   |
| MSP (Major sperm protein) domain-containing protein            | TGVEG_chrIV:1528118-1528837(+)    | 239  | TGVEG_318160  | 26 kDa  | 1  | NR-20731 |
| Myb family DNA-binding domain-containing protein               | TGME49_chrVIII:6836179-6844833(-) | 2258 | TGME49_200385 | 246 kDa | 1  | NR-362   |
| myosin A                                                       | TGVEG_chrX:4799607-4805269(+)     | 831  | TGVEG_235470  | 93 kDa  | 14 | NR-223   |
| myosin A                                                       | TGME49_chrX:4884161-4889835(+)    | 831  | TGME49_235470 | 93 kDa  | 13 | NR-362   |

|                                                        |                                   |      |               |         |    |          |
|--------------------------------------------------------|-----------------------------------|------|---------------|---------|----|----------|
| myosin C                                               | TGME49_chrVIIb:5017832-5025813(+) | 1171 | TGME49_255190 | 133 kDa | 2  | NR-225   |
| myosin F                                               | TGVEG_chrXII:5799662-5815227(+)   | 1953 | TGVEG_278870  | 216 kDa | 2  | NR-20731 |
| myosin F                                               | TGME49_chrXII:5794929-5810468(+)  | 1953 | TGME49_278870 | 216 kDa | 1  | NR-362   |
| myosin G                                               | TGVEG_chrXI:4302075-4321707(-)    | 2059 | TGVEG_314780  | 227 kDa | 2  | NR-20730 |
| myosin H                                               | TGVEG_chrVI:2464608-2483173(-)    | 1513 | TGVEG_243250  | 170 kDa | 2  | NR-223   |
| myosin H                                               | TGME49_chrVI:2462340-2480954(-)   | 1513 | TGME49_243250 | 170 kDa | 1  | NR-225   |
| myosin heavy chain, putative                           | TGME49_chrlb:636374-641145(+)     | 1124 | TGME49_208370 | 125 kDa | 1  | NR-362   |
| myosin J                                               | TGVEG_chrVIIb:4047901-4058970(+)  | 2532 | TGVEG_257470  | 274 kDa | 2  | NR-20734 |
| myosin light chain MLC1                                | TGVEG_chrVIIb:3928516-3930816(+)  | 213  | TGVEG_257680  | 24 kDa  | 3  | NR-20731 |
| NAC domain-containing protein                          | TGVEG_chrVIIa:1404556-1406339(+)  | 189  | TGVEG_205558  | 21 kDa  | 2  | NR-20731 |
| NEK kinase                                             | TGVEG_chrIX:2558938-2580773(-)    | 4925 | TGVEG_288440  | 535 kDa | 1  | NR-44106 |
| nmda receptor glutamate-binding chain                  | TGVEG_chrXI:734449-736235(+)      | 265  | TGVEG_309560  | 29 kDa  | 4  | NR-20731 |
| nmda receptor glutamate-binding chain                  | TGME49_chrXI:725854-727812(+)     | 265  | TGME49_309560 | 29 kDa  | 2  | NR-225   |
| NOL1/NOP2/sun family protein                           | TGVEG_chrXI:214937-217070(+)      | 613  | TGVEG_306900  | 67 kDa  | 3  | NR-20730 |
| non-specific serine/threonine protein kinase           | TGVEG_chrXI:3805561-3816180(+)    | 3401 | TGVEG_313900  | 381 kDa | 3  | NR-20734 |
| non-specific serine/threonine protein kinase           | TGVEG_chrVIII:6498625-6534482(-)  | 8428 | TGVEG_268370  | 904 kDa | 2  | NR-20734 |
| Not1 amine-terminal domain, CCR4-NOT complex component | TGVEG_chrX:4415715-4425585(+)     | 1754 | TGVEG_234640  | 184 kDa | 1  | NR-223   |
| NTPase                                                 | TGVEG_chrXII:6715158-6716272(-)   | 372  | TGVEG_440110  | 41 kDa  | 3  | NR-20731 |
| NTPase II                                              | TGVEG_chrXII:6709277-6710425(-)   | 383  | TGVEG_277270  | 42 kDa  | 3  | NR-20734 |
| nuclear factor NF3                                     | TGVEG_chrVIIb:2283289-2287810(-)  | 311  | TGVEG_260440  | 34 kDa  | 6  | NR-20731 |
| nuclear factor NF3                                     | TGME49_chrVIIb:2268128-2272649(-) | 311  | TGME49_260440 | 34 kDa  | 2  | NR-225   |
| nuclear factor NF7                                     | TGVEG_chrXII:4157915-4161960(+)   | 497  | TGVEG_248810  | 54 kDa  | 3  | NR-20731 |
| nuclease and tudor domain-containing protein           | TGVEG_chrVI:37524-46305(+)        | 941  | TGVEG_238050  | 104 kDa | 1  | NR-20731 |
| nucleolar protein,nop52 protein                        | TGVEG_chrX:2524984-2529025(+)     | 1095 | TGVEG_224970  | 117 kDa | 1  | NR-223   |
| nucleolar protein,nop52 protein                        | TGME49_chrX:2623855-2627893(+)    | 1094 | TGME49_224970 | 117 kDa | 1  | NR-225   |
| nucleoporin autopeptidase                              | TGVEG_chrVIIb:2752565-2764560(-)  | 2894 | TGVEG_259640  | 302 kDa | 1  | NR-20730 |
| nucleoredoxin family protein                           | TGVEG_chrX:2448138-2452857(+)     | 416  | TGVEG_225060  | 45 kDa  | 1  | NR-20731 |
| nucleoside-triphosphatase                              | KI545800:208-1320(+)              | 370  | TGVEG_360830  | 41 kDa  | 19 | NR-20731 |
| nucleosome assembly protein (nap) protein              | TGVEG_chrVI:3033297-3038877(+)    | 433  | TGVEG_244110  | 49 kDa  | 4  | NR-20731 |
| nucleosome assembly protein (nap) protein              | TGVEG_chrVIIb:4558311-4562015(+)  | 812  | TGVEG_256060  | 89 kDa  | 1  | NR-223   |

|                                                    |                                   |      |               |         |   |          |
|----------------------------------------------------|-----------------------------------|------|---------------|---------|---|----------|
| nudix -type motif 9 isoform a family protein       | TGME49_chrXII:3176609-3179568(-)  | 546  | TGME49_247220 | 61 kDa  | 2 | NR-225   |
| origin recognition complex subunit 2 protein       | TGVEG_chrXII:2353721-2362397(-)   | 884  | TGVEG_245570  | 95 kDa  | 1 | NR-223   |
| Oxysterol-binding protein                          | TGVEG_chrIa:804678-809387(+)      | 931  | TGVEG_294320  | 103 kDa | 2 | NR-20730 |
| patched family protein                             | TGVEG_chrIV:284913-293877(+)      | 1705 | TGVEG_320500  | 190 kDa | 1 | NR-20730 |
| patched family protein                             | TGVEG_chrV:2353943-2363998(-)     | 1933 | TGVEG_285470  | 212 kDa | 1 | NR-20734 |
| patched family protein                             | TGME49_chrIV:295448-304405(+)     | 1705 | TGME49_320500 | 190 kDa | 1 | NR-225   |
| PCI domain-containing protein                      | TGVEG_chrVIII:3428815-3436101(+)  | 601  | TGVEG_273520  | 67 kDa  | 2 | NR-20730 |
| PDI family protein                                 | TGVEG_chrVIII:2087641-2089378(-)  | 220  | TGVEG_232410  | 25 kDa  | 6 | NR-223   |
| PDI family protein                                 | TGME49_chrVIII:2079700-2081437(-) | 220  | TGME49_232410 | 25 kDa  | 6 | NR-362   |
| pentatricopeptide repeat domain-containing protein | TGME49_chrVI:2694606-2700641(+)   | 1419 | TGME49_243530 | 157 kDa | 1 | NR-225   |
| pentatricopeptide repeat domain-containing protein | TGVEG_chrVI:2698485-2704514(+)    | 1422 | TGVEG_243530  | 157 kDa | 1 | NR-44106 |
| PEP-carboxykinase I                                | TGVEG_chrIX:3399221-3402416(+)    | 677  | TGVEG_289650  | 75 kDa  | 3 | NR-20731 |
| PEP-carboxykinase I                                | TGME49_chrIX:3365112-3368307(+)   | 677  | TGME49_289650 | 75 kDa  | 3 | NR-225   |
| peptidase family c50 protein                       | TGVEG_chrVIIb:992145-1016567(+)   | 6890 | TGVEG_262825  | 744 kDa | 1 | NR-20734 |
| peptidase M16 inactive domain-containing protein   | TGVEG_chrIII:1281442-1290850(-)   | 1604 | TGVEG_253890  | 176 kDa | 1 | NR-20734 |
| peptidase M16, alpha subunit, putative             | TGME49_chrVIIa:3108389-3114699(-) | 563  | TGME49_202680 | 62 kDa  | 2 | NR-362   |
| peptidyl-prolyl cis-trans isomerase                | TGVEG_chrVI:1744740-1747216(-)    | 575  | TGVEG_241830  | 64 kDa  | 1 | NR-20734 |
| peptidyl-prolyl cis-trans isomerase                | TGME49_chrV:2913986-2921224(-)    | 503  | TGME49_283850 | 56 kDa  | 2 | NR-225   |
| peroxiredoxin 6, putative                          | TGME49_chrXI:558298-561176(-)     | 402  | TGME49_309210 | 44 kDa  | 3 | NR-362   |
| peroxiredoxin PRX3                                 | TGVEG_chrVIII:763292-765390(-)    | 283  | TGVEG_230410  | 31 kDa  | 4 | NR-20731 |
| peroxiredoxin PRX3 (PRX3)                          | TGME49_chrVIII:757258-759362(-)   | 283  | TGME49_230410 | 31 kDa  | 2 | NR-362   |
| PHD-finger domain-containing protein               | TGVEG_chrX:4443613-4460389(+)     | 4647 | TGVEG_234900  | 479 kDa | 1 | NR-20731 |
| PHD-finger domain-containing protein               | TGME49_chrIX:4029731-4034042(+)   | 527  | TGME49_291000 | 57 kDa  | 1 | NR-362   |
| phosphate carrier, putative                        | TGME49_chrXII:5706616-5710057(-)  | 479  | TGME49_278990 | 53 kDa  | 2 | NR-362   |
| phosphatidylinositol 3- and 4-kinase               | TGME49_chrX:195964-226772(+)      | 6780 | TGME49_228690 | 734 kDa | 2 | NR-362   |
| phosphatidylinositol 3- and 4-kinase               | TGVEG_chrIX:1379807-1416675(+)    | 8859 | TGVEG_266010  | 962 kDa | 1 | NR-44106 |
| phosphofructokinase PFKII                          | TGVEG_chrX:1077812-1088184(-)     | 1225 | TGVEG_226960  | 131 kDa | 8 | NR-223   |
| phosphofructokinase PFKII (PFKII)                  | TGME49_chrX:1186437-1197681(-)    | 1225 | TGME49_226960 | 131 kDa | 3 | NR-362   |
| phosphoglycerate kinase PGKI                       | TGVEG_chrIV:1482280-1485236(+)    | 418  | TGVEG_318230  | 45 kDa  | 2 | NR-223   |
| phosphoglycerate kinase PGKI (PGKI)                | TGME49_chrIV:1472986-1475939(+)   | 417  | TGME49_318230 | 45 kDa  | 2 | NR-362   |
| phosphoglycerate mutase family protein             | TGVEG_chrIV:1498944-1509254(-)    | 1971 | TGVEG_318190  | 209 kDa | 1 | NR-20730 |

|                                                                     |                                   |      |               |         |    |          |
|---------------------------------------------------------------------|-----------------------------------|------|---------------|---------|----|----------|
| phosphoglycerate mutase PGMII                                       | TGVEG_chrII:1519703-1523584(-)    | 339  | TGVEG_297060  | 38 kDa  | 2  | NR-20731 |
| phosphoglycerate mutase PGMII (PGMII)                               | TGME49_chrII:1510431-1514312(-)   | 339  | TGME49_297060 | 38 kDa  | 2  | NR-362   |
| phospholipase, patatin family protein                               | TGVEG_chrIX:5268276-5279505(+)    | 2579 | TGVEG_305140  | 277 kDa | 1  | NR-20730 |
| phospholipase, patatin family protein                               | TGME49_chrVIII:1377012-1386339(-) | 2904 | TGME49_231370 | 315 kDa | 1  | NR-362   |
| phosphoribosylpyrophosphate synthetase                              | TGVEG_chrV:46448-49210(+)         | 557  | TGVEG_220100  | 61 kDa  | 1  | NR-223   |
| phosphorylase family protein                                        | TGVEG_chrXI:1509271-1512371(-)    | 303  | TGVEG_310640  | 33 kDa  | 4  | NR-20731 |
| phosphorylase family protein                                        | TGME49_chrXI:1497307-1500407(-)   | 303  | TGME49_310640 | 33 kDa  | 2  | NR-225   |
| phosphotransferase enzyme family protein                            | TGVEG_chrIV:176562-181978(+)      | 630  | TGVEG_320630  | 69 kDa  | 2  | NR-20731 |
| plasma membrane-type Ca(2+)-ATPase A1 PMCAA1                        | TGVEG_chrXI:2437255-2443531(+)    | 1822 | TGVEG_312100  | 199 kDa | 2  | NR-20734 |
| PLU-1 family protein                                                | TGVEG_chrIII:1153957-1182056(-)   | 8088 | TGVEG_253750  | 856 kDa | 2  | NR-223   |
| poly(ADP-ribose) glycohydrolase                                     | TGME49_chrVIIa:487434-489728(+)   | 553  | TGME49_280380 | 62 kDa  | 2  | NR-225   |
| poly(ADP-ribose) polymerase catalytic domain-containing protein     | TGVEG_chrVIII:4962683-4979138(+)  | 1012 | TGVEG_270840  | 113 kDa | 1  | NR-20731 |
| polynucleotide adenylyltransferase                                  | TGVEG_chrXII:6190090-6201789(-)   | 2477 | TGVEG_278260  | 269 kDa | 1  | NR-20730 |
| profilin PRF                                                        | TGVEG_chrIa:520372-521713(-)      | 165  | TGVEG_293690  | 18 kDa  | 1  | NR-223   |
| prolyl-tRNA synthetase (ProRS)                                      | TGVEG_chrXII:562318-571308(-)     | 830  | TGVEG_219850  | 93 kDa  | 3  | NR-20731 |
| protamine P1 protein                                                | TGVEG_chrVI:2488144-2497445(-)    | 2719 | TGVEG_243265  | 294 kDa | 1  | NR-223   |
| protease inhibitor PI2 (PI2)                                        | TGME49_chrb:712174-715146(-)      | 318  | TGME49_208450 | 35 kDa  | 2  | NR-225   |
| Proteasome/cyclosome repeat-containing protein                      | TGVEG_chrVIIb:840075-852112(-)    | 988  | TGVEG_263060B | 107 kDa | 2  | NR-20731 |
| protein disulfide isomerase                                         | TGVEG_chrIV:1650648-1652472(+)    | 471  | TGVEG_211680  | 53 kDa  | 21 | NR-20731 |
| protein disulfide isomerase                                         | TGME49_chrIV:1626551-1628375(+)   | 471  | TGME49_211680 | 53 kDa  | 15 | NR-362   |
| protein disulfide isomerase-related protein (provisional), putative | TGME49_chrXII:4417115-4422515(+)  | 547  | TGME49_249270 | 60 kDa  | 3  | NR-362   |
| protein disulfide-isomerase domain-containing protein               | TGME49_chrVI:19374-28466(-)       | 1378 | TGME49_238040 | 153 kDa | 1  | NR-362   |
| protein phosphatase 2C domain-containing protein                    | TGVEG_chrVIII:5290235-5295653(+)  | 538  | TGVEG_270320  | 59 kDa  | 6  | NR-20731 |
| protein phosphatase 2C domain-containing protein                    | TGVEG_chrVIII:2025586-2030454(-)  | 547  | TGVEG_232340  | 60 kDa  | 3  | NR-20731 |
| protein phosphatase 2C domain-containing protein                    | TGVEG_chrVIII:1756683-1769591(+)  | 4071 | TGVEG_232010  | 441 kDa | 1  | NR-223   |
| protein phosphatase 2C domain-containing protein                    | TGME49_chrVIII:5276555-5282525(+) | 538  | TGME49_270320 | 59 kDa  | 13 | NR-225   |

|                                                                                  |                                   |      |               |         |    |          |
|----------------------------------------------------------------------------------|-----------------------------------|------|---------------|---------|----|----------|
| protein phosphatase PP2C-hn                                                      | TGVEG_chrVIIa:4453479-4458257(-)  | 478  | TGVEG_282055  | 52 kDa  | 1  | NR-44106 |
| protein phosphatase PP2C-hn (PP2CHN)                                             | TGME49_chrVIIa:4358629-4363407(-) | 479  | TGME49_282055 | 52 kDa  | 1  | NR-225   |
| Prp31-15.5k-U4 Snrna Complex family protein                                      | TGVEG_chrX:5361008-5362868(-)     | 182  | TGVEG_236580  | 20 kDa  | 4  | NR-20731 |
| Prp31-15.5k-U4 Snrna Complex family protein                                      | TGME49_chrX:5435939-5437797(-)    | 182  | TGME49_236580 | 20 kDa  | 2  | NR-225   |
| PST-A-like protein                                                               | TGVEG_chrX:1558330-1561329(+)     | 999  | TGVEG_226390  | 108 kDa | 1  | NR-223   |
| Pumilio-family RNA binding repeat-containing protein                             | TGVEG_chrIV:1400671-1410422(-)    | 1913 | TGVEG_318350  | 203 kDa | 1  | NR-20731 |
| putative 26S protease regulatory subunit 4                                       | TGVEG_chrIX:816072-821572(+)      | 441  | TGVEG_267080  | 49 kDa  | 2  | NR-20731 |
| putative 50S ribosomal protein L3                                                | TGVEG_chrVI:2669184-2672963(-)    | 569  | TGVEG_243480  | 62 kDa  | 1  | NR-20730 |
| putative ABC transporter                                                         | TGVEG_chrIb:554935-570626(+)      | 1928 | TGVEG_208050B | 205 kDa | 1  | NR-44106 |
| putative Acetyl-coenzyme A synthetase 2                                          | TGVEG_chrIX:1079549-1088136(+)    | 714  | TGVEG_266640  | 80 kDa  | 3  | NR-223   |
| putative activating signal cointegrator 1 complex subunit 3 family 1 ASCC3L1     | TGVEG_chrX:3770588-3787615(+)     | 2207 | TGVEG_223390  | 248 kDa | 3  | NR-20731 |
| putative adenine nucleotide translocator                                         | TGVEG_chrXII:4912658-4913614(+)   | 318  | TGVEG_249900  | 35 kDa  | 8  | NR-20730 |
| putative adenosylhomocysteinase                                                  | TGVEG_chrX:2455072-2457477(-)     | 588  | TGVEG_225050  | 64 kDa  | 4  | NR-20731 |
| putative adenylate cyclase                                                       | TGVEG_chrVIII:4937283-4954670(-)  | 2040 | TGVEG_270865  | 223 kDa | 2  | NR-20730 |
| putative adenylate kinase                                                        | TGVEG_chrX:2602085-2604719(+)     | 257  | TGVEG_224900  | 29 kDa  | 3  | NR-223   |
| putative alkyl hydroperoxide reductase/ Thiol specific antioxidant/ Mal allergen | TGVEG_chrXII:2177093-2177683(-)   | 196  | TGVEG_217890  | 22 kDa  | 3  | NR-223   |
| putative aminopeptidase n                                                        | TGVEG_chrX:2954743-2962685(+)     | 970  | TGVEG_224460  | 109 kDa | 5  | NR-20731 |
| putative aminopeptidase N                                                        | TGVEG_chrX:2964121-2973451(-)     | 1419 | TGVEG_224350  | 157 kDa | 3  | NR-20731 |
| putative asparagine synthetase                                                   | TGVEG_chrIII:951737-957963(+)     | 588  | TGVEG_253430  | 66 kDa  | 2  | NR-20731 |
| putative ATP synthase                                                            | TGVEG_chrX:1772072-1774183(-)     | 183  | TGVEG_226000  | 19 kDa  | 3  | NR-223   |
| putative ATPase synthase subunit alpha                                           | TGVEG_chrVIIa:1897696-1905110(+)  | 577  | TGVEG_204400  | 62 kDa  | 19 | NR-20731 |
| putative ATP-binding surface antigen                                             | TGVEG_chrIX:2911675-2922678(-)    | 3519 | TGVEG_288960  | 385 kDa | 2  | NR-20730 |
| putative beta adaptin protein                                                    | TGVEG_chrVI:1502152-1515600(+)    | 924  | TGVEG_240870  | 102 kDa | 1  | NR-20731 |
| putative beta-tubulin                                                            | TGVEG_chrII:492805-495142(-)      | 449  | TGVEG_221620  | 50 kDa  | 2  | NR-44106 |
| putative calcium binding protein precursor                                       | TGVEG_chrVIII:298762-301306(-)    | 335  | TGVEG_229480  | 38 kDa  | 5  | NR-44106 |
| putative calmodulin                                                              | TGVEG_chrIX:5241261-5241662(+)    | 133  | TGVEG_305050  | 15 kDa  | 2  | NR-223   |
| putative chaperonin cpn60                                                        | TGVEG_chrVI:1350758-1354337(+)    | 667  | TGVEG_240600  | 72 kDa  | 3  | NR-20731 |
| putative Chromosome-associated kinesin KLP1                                      | TGVEG_chrII:337136-345913(+)      | 928  | TGVEG_221420  | 104 kDa | 6  | NR-20730 |
| putative clathrin heavy chain                                                    | TGVEG_chrIX:3996894-4009089(-)    | 1731 | TGVEG_290950  | 194 kDa | 3  | NR-20730 |
| putative COPI associated protein                                                 | TGVEG_chrVIIb:2215338-2218163(+)  | 270  | TGVEG_260500  | 30 kDa  | 1  | NR-20730 |

|                                                                 |                                  |      |               |         |    |          |
|-----------------------------------------------------------------|----------------------------------|------|---------------|---------|----|----------|
| putative cyclase-associated protein                             | TGVEG_chrXI:1023611-1024556(-)   | 203  | TGVEG_310030  | 22 kDa  | 4  | NR-20731 |
| putative cytochrome c                                           | TGVEG_chrXII:634403-635394(-)    | 115  | TGVEG_219750  | 12 kDa  | 2  | NR-223   |
| putative dense granule protein GRA12                            | TGVEG_chrIII:190520-192698(+)    | 383  | TGVEG_275860  | 43 kDa  | 2  | NR-44106 |
| putative DNA ligase (NAD+)                                      | TGVEG_chrXI:4448725-4458061(-)   | 1975 | TGVEG_314955  | 209 kDa | 1  | NR-223   |
| putative DnaJ family chaperone                                  | TGVEG_chrXI:1915273-1920287(-)   | 426  | TGVEG_311240  | 47 kDa  | 1  | NR-20731 |
| putative DnaJ protein                                           | TGVEG_chrVIIb:3458874-3460460(-) | 397  | TGVEG_258390  | 45 kDa  | 2  | NR-20731 |
| putative duplicated carbonic anhydrase                          | TGVEG_chrII:1525801-1527662(-)   | 519  | TGVEG_297070  | 58 kDa  | 1  | NR-44106 |
| putative dynein heavy chain 2                                   | TGVEG_chrXII:4825848-4874885(+)  | 4140 | TGVEG_249840  | 471 kDa | 1  | NR-20734 |
| putative elongation factor 1-alpha (EF-1-ALPHA)                 | TGVEG_chrla:1156790-1158410(-)   | 448  | TGVEG_294800  | 49 kDa  | 10 | NR-44106 |
| putative elongation factor 1-gamma                              | TGVEG_chrXII:176566-179166(+)    | 394  | TGVEG_300140  | 44 kDa  | 1  | NR-223   |
| putative elongation factor Tu                                   | TGVEG_chrVIIb:1326322-1329983(-) | 552  | TGVEG_262380  | 60 kDa  | 2  | NR-223   |
| putative eukaryotic initiation factor-1A                        | TGVEG_chrVIIb:1067700-1071695(-) | 159  | TGVEG_262720  | 18 kDa  | 2  | NR-20731 |
| putative eukaryotic initiation factor-2 gamma                   | TGVEG_chrX:5130512-5136786(+)    | 465  | TGVEG_235970  | 51 kDa  | 2  | NR-20731 |
| putative eukaryotic initiation factor-3, subunit 3              | TGVEG_chrXII:5422858-5425666(+)  | 600  | TGVEG_251500  | 66 kDa  | 1  | NR-20731 |
| putative eukaryotic initiation factor-3, subunit 8              | TGVEG_chrla:1013425-1020262(-)   | 971  | TGVEG_294620  | 109 kDa | 3  | NR-20731 |
| putative eukaryotic initiation factor-4A                        | TGVEG_chrXII:5172836-5174873(-)  | 412  | TGVEG_250770  | 47 kDa  | 5  | NR-44106 |
| putative eukaryotic initiation factor-4E                        | TGVEG_chrXI:4542788-4547858(+)   | 455  | TGVEG_315150  | 50 kDa  | 1  | NR-20734 |
| putative eukaryotic porin                                       | TGVEG_chrXII:1601555-1606742(+)  | 466  | TGVEG_218280  | 51 kDa  | 1  | NR-223   |
| putative eukaryotic translation initiation factor 2B            | TGVEG_chrXI:3086188-3093160(+)   | 724  | TGVEG_313060  | 79 kDa  | 1  | NR-20731 |
| putative eukaryotic translation initiation factor 3 subunit 7   | TGVEG_chrIV:2692252-2695526(+)   | 288  | TGVEG_317720B | 32 kDa  | 3  | NR-20731 |
| putative eukaryotic translation initiation factor 4A, isoform 3 | TGVEG_chrVIIb:4493401-4496420(+) | 395  | TGVEG_256770  | 45 kDa  | 2  | NR-20731 |
| putative gamma-glutamyl phosphate reductase                     | TGVEG_chrVIII:5208117-5210261(+) | 502  | TGVEG_270550  | 54 kDa  | 2  | NR-20731 |
| putative glutamic acid-rcih protein                             | TGVEG_chrlb:1513294-1536325(+)   | 4436 | TGVEG_209880  | 478 kDa | 1  | NR-44106 |
| putative glycogen synthase                                      | TGVEG_chrII:1219111-1251256(-)   | 3004 | TGVEG_222800  | 325 kDa | 1  | NR-20734 |
| putative glyoxalase                                             | TGVEG_chrVIIa:1666916-1693063(+) | 4813 | TGVEG_205130  | 518 kDa | 1  | NR-20730 |
| putative heat shock protein 90                                  | TGVEG_chrVI:3363319-3366953(+)   | 847  | TGVEG_244560  | 97 kDa  | 35 | NR-20731 |
| putative histone lysine methyltransferase, SET                  | TGVEG_chrla:1696226-1717114(-)   | 5175 | TGVEG_295610  | 558 kDa | 1  | NR-20731 |

|                                                                    |                                  |      |               |         |   |          |
|--------------------------------------------------------------------|----------------------------------|------|---------------|---------|---|----------|
| putative histone lysine methyltransferase, SET                     | TGVEG_chrVIIa:4028130-4035203(+) | 1635 | TGVEG_201250  | 178 kDa | 1 | NR-20734 |
| putative importin alpha                                            | TGVEG_chrIII:471888-481163(+)    | 545  | TGVEG_252290  | 59 kDa  | 2 | NR-223   |
| putative intraflagellar transport component IFT74/72 protein       | TGVEG_chrXII:5121660-5125728(-)  | 606  | TGVEG_250720  | 70 kDa  | 2 | NR-20730 |
| putative kelch motif protein                                       | TGVEG_chrIV:1017742-1019670(+)   | 481  | TGVEG_319340  | 52 kDa  | 1 | NR-20731 |
| putative lysophospholipase                                         | TGVEG_chrV:1730367-1733234(-)    | 955  | TGVEG_286580  | 107 kDa | 4 | NR-44106 |
| putative mandelonitrile lyase                                      | TGVEG_chrIII:756069-764038(-)    | 796  | TGVEG_253120  | 88 kDa  | 2 | NR-223   |
| putative membrane protein                                          | TGVEG_chrX:2005458-2007700(-)    | 128  | TGVEG_225730  | 15 kDa  | 2 | NR-223   |
| putative membrane protein                                          | TGVEG_chrIb:1887600-1903000(+)   | 3817 | TGVEG_321340  | 418 kDa | 1 | NR-44106 |
| putative microtubule-binding protein                               | TGVEG_chrXII:4948353-4953132(-)  | 838  | TGVEG_249990  | 93 kDa  | 6 | NR-20731 |
| putative myosin heavy chain                                        | TGVEG_chrIb:634619-639390(+)     | 1124 | TGVEG_208370  | 125 kDa | 4 | NR-20731 |
| putative myosin heavy chain                                        | TGVEG_chrXI:1361257-1375922(+)   | 1301 | TGVEG_310450  | 148 kDa | 2 | NR-44106 |
| putative myosin regulatory light chain                             | TGVEG_chrXI:5002128-5004882(+)   | 206  | TGVEG_315780  | 23 kDa  | 1 | NR-20730 |
| putative nucleolar protein                                         | TGVEG_chrXII:3330211-3334500(+)  | 536  | TGVEG_247470  | 60 kDa  | 3 | NR-20731 |
| putative nucleolar protein 5                                       | TGVEG_chrVIIa:1430944-1435059(-) | 490  | TGVEG_205510  | 54 kDa  | 5 | NR-20731 |
| putative omega secalin                                             | TGVEG_chrVIII:1677226-1680480(-) | 1084 | TGVEG_231960B | 115 kDa | 2 | NR-20730 |
| putative peptidase M16, alpha subunit                              | TGVEG_chrVIIa:3195846-3202118(-) | 563  | TGVEG_202680  | 62 kDa  | 5 | NR-20731 |
| putative peroxiredoxin 6                                           | TGVEG_chrXI:567489-570367(-)     | 402  | TGVEG_309210  | 44 kDa  | 2 | NR-223   |
| putative phosphate carrier                                         | TGVEG_chrXII:5712339-5715780(-)  | 479  | TGVEG_278990  | 53 kDa  | 5 | NR-223   |
| putative polyadenylate binding protein                             | TGVEG_chrX:2677455-2679764(+)    | 769  | TGVEG_224850  | 83 kDa  | 3 | NR-20731 |
| putative Ppg3                                                      | TGVEG_chrV:573073-575444(-)      | 671  | TGVEG_212800  | 73 kDa  | 1 | NR-44106 |
| putative preprotein translocase Sec61                              | TGVEG_chrVIII:5497430-5501976(-) | 473  | TGVEG_269980  | 52 kDa  | 1 | NR-223   |
| putative proliferation-associated protein 2G4                      | TGVEG_chrIX:235846-240462(-)     | 462  | TGVEG_279390  | 50 kDa  | 6 | NR-20731 |
| putative protein disulfide isomerase-related protein (provisional) | TGVEG_chrXII:4391599-4396993(+)  | 547  | TGVEG_249270  | 60 kDa  | 5 | NR-20731 |
| putative pyruvate dehydrogenase E1 component, beta subunit         | TGVEG_chrXI:4077545-4081183(+)   | 423  | TGVEG_314400  | 46 kDa  | 2 | NR-223   |
| putative rhoptry protein                                           | TGVEG_chrXI:4594136-4601478(-)   | 1010 | TGVEG_315210  | 116 kDa | 3 | NR-20734 |
| putative ribosomal protein S11                                     | TGVEG_chrVIII:1252717-1254813(+) | 393  | TGVEG_231120  | 43 kDa  | 1 | NR-20734 |
| putative small GTPase Rab2                                         | TGVEG_chrXI:2408541-2413023(+)   | 214  | TGVEG_312050  | 24 kDa  | 2 | NR-44106 |
| putative sortilin                                                  | TGVEG_chrIX:3637455-3647171(-)   | 1033 | TGVEG_290160  | 114 kDa | 2 | NR-20731 |
| putative splicing factor 3b, subunit 3                             | TGVEG_chrVIII:1143763-1154839(-) | 1233 | TGVEG_230960  | 136 kDa | 2 | NR-20731 |
| putative succinate-Coenzyme A ligase, beta subunit                 | TGVEG_chrXI:795855-799078(+)     | 498  | TGVEG_309752  | 53 kDa  | 2 | NR-20730 |



|                                                               |                                  |      |              |         |    |          |
|---------------------------------------------------------------|----------------------------------|------|--------------|---------|----|----------|
| putative target of rapamycin (TOR)                            | TGVEG_chrXI:5306482-5330914(+)   | 4922 | TGVEG_316430 | 544 kDa | 2  | NR-20734 |
| putative Tbc domain,related protein                           | TGVEG_chrII:589493-601267(-)     | 3378 | TGVEG_221720 | 364 kDa | 1  | NR-44106 |
| putative T-complex protein 1, epsilon subunit (TCP-1-epsilon) | TGVEG_chrVIIa:3473308-3479226(+) | 536  | TGVEG_202370 | 59 kDa  | 1  | NR-223   |
| putative thioredoxin                                          | TGVEG_chrX:3262479-3264347(-)    | 622  | TGVEG_224060 | 69 kDa  | 2  | NR-44106 |
| putative translation elongation factor 2 family protein       | TGVEG_chrVIIa:1455814-1459480(+) | 832  | TGVEG_205470 | 93 kDa  | 13 | NR-20731 |
| putative translation initiation factor eIF-5A                 | TGVEG_chrXII:5591060-5591545(-)  | 161  | TGVEG_251810 | 17 kDa  | 5  | NR-20731 |
| putative translation initiation factor IF-2                   | TGVEG_chrX:6121728-6132069(-)    | 1140 | TGVEG_214270 | 126 kDa | 1  | NR-20731 |
| putative transmembrane protein                                | TGVEG_chrXI:2614451-2629521(-)   | 1892 | TGVEG_312330 | 208 kDa | 1  | NR-20730 |
| putative transmembrane protein                                | TGVEG_chrVIIa:4201708-4217249(+) | 3668 | TGVEG_281440 | 390 kDa | 1  | NR-20730 |
| putative transmembrane protein                                | TGVEG_chrII:1973207-1989926(-)   | 3864 | TGVEG_297745 | 413 kDa | 1  | NR-20730 |
| putative transmembrane protein                                | TGVEG_chrVIIb:1773648-1777639(-) | 1072 | TGVEG_261430 | 117 kDa | 1  | NR-20731 |
| putative transmembrane protein                                | TGVEG_chrVIII:4014842-4020677(-) | 1257 | TGVEG_272390 | 132 kDa | 3  | NR-20731 |
| putative transmembrane protein                                | TGVEG_chrVIII:727691-739685(-)   | 1254 | TGVEG_230350 | 139 kDa | 1  | NR-20731 |
| putative transmembrane protein                                | TGVEG_chrIa:375668-393288(+)     | 1771 | TGVEG_293500 | 195 kDa | 2  | NR-20731 |
| putative transmembrane protein                                | TGVEG_chrVIIa:1513395-1529483(+) | 2607 | TGVEG_205360 | 293 kDa | 1  | NR-20731 |
| putative transmembrane protein                                | TGVEG_chrIX:332251-345489(+)     | 3661 | TGVEG_267855 | 392 kDa | 1  | NR-20731 |
| putative transmembrane protein                                | TGVEG_chrVIII:6301541-6303370(-) | 609  | TGVEG_268800 | 67 kDa  | 1  | NR-20731 |
| putative transmembrane protein                                | TGVEG_chrX:3842599-3847752(+)    | 683  | TGVEG_212300 | 76 kDa  | 2  | NR-20731 |
| putative transmembrane protein                                | TGVEG_chrVIII:5695205-5697802(+) | 865  | TGVEG_269690 | 94 kDa  | 3  | NR-20731 |
| putative transmembrane protein                                | TGVEG_chrIX:473436-483831(+)     | 1921 | TGVEG_267690 | 211 kDa | 1  | NR-20734 |
| putative transmembrane protein                                | TGVEG_chrX:5757322-5764645(-)    | 2088 | TGVEG_237290 | 223 kDa | 2  | NR-20734 |
| putative transmembrane protein                                | TGVEG_chrV:482753-500456(+)      | 4703 | TGVEG_287480 | 503 kDa | 1  | NR-20734 |
| putative transmembrane protein                                | TGVEG_chrVIIa:1704934-1709182(-) | 556  | TGVEG_205100 | 60 kDa  | 1  | NR-20734 |
| putative transmembrane protein                                | TGVEG_chrVIIb:3131775-3136457(-) | 916  | TGVEG_258870 | 102 kDa | 5  | NR-223   |
| putative transmembrane protein                                | TGVEG_chrVIIb:3331717-3338300(+) | 1292 | TGVEG_258590 | 141 kDa | 1  | NR-223   |
| putative transmembrane protein                                | TGVEG_chrVIII:2521122-2527161(-) | 1476 | TGVEG_233220 | 160 kDa | 1  | NR-223   |
| putative transmembrane protein                                | TGVEG_chrXI:6489416-6490048(+)   | 210  | TGVEG_215980 | 24 kDa  | 4  | NR-223   |
| putative transmembrane protein                                | TGVEG_chrVIII:475416-477390(-)   | 307  | TGVEG_229920 | 35 kDa  | 2  | NR-223   |
| putative transmembrane protein                                | TGVEG_chrX:1568048-1569184(+)    | 378  | TGVEG_226380 | 43 kDa  | 2  | NR-223   |
| putative transmembrane protein                                | TGVEG_chrXI:1892805-1912140(+)   | 4690 | TGVEG_311230 | 505 kDa | 1  | NR-223   |
| putative transmembrane protein                                | TGVEG_chrX:6208273-6209745(+)    | 490  | TGVEG_363940 | 52 kDa  | 1  | NR-223   |
| putative transmembrane protein                                | TGVEG_chrXII:341835-344783(-)    | 545  | TGVEG_299780 | 59 kDa  | 2  | NR-223   |
| putative transmembrane protein                                | TGVEG_chrII:1140240-1141970(+)   | 576  | TGVEG_222420 | 63 kDa  | 2  | NR-223   |
| putative transmembrane protein                                | TGVEG_chrXI:6202785-6232703(-)   | 7450 | TGVEG_216335 | 820 kDa | 1  | NR-223   |

|                                                                        |                                  |       |               |          |   |          |
|------------------------------------------------------------------------|----------------------------------|-------|---------------|----------|---|----------|
| putative transmembrane protein                                         | TGVEG_chrIX:3061054-3065890(-)   | 1002  | TGVEG_289150  | 111 kDa  | 2 | NR-44106 |
| putative transmembrane protein                                         | TGVEG_chrIb:1637561-1639849(-)   | 332   | TGVEG_321710  | 36 kDa   | 2 | NR-44106 |
| putative transmembrane protein                                         | TGVEG_chrVIII:6693845-6707160(+) | 3484  | TGVEG_268035  | 378 kDa  | 2 | NR-44106 |
| putative transmembrane protein                                         | TGVEG_chrII:90012-91657(+)       | 390   | TGVEG_279100B | 43 kDa   | 9 | NR-44106 |
| putative transmembrane protein                                         | TGVEG_chrVIIa:2208400-2211590(+) | 566   | TGVEG_203930  | 61 kDa   | 2 | NR-44106 |
| putative transmembrane protein                                         | TGVEG_chrXI:5032084-5034535(+)   | 563   | TGVEG_315820  | 61 kDa   | 2 | NR-44106 |
| putative transmembrane protein                                         | TGVEG_chrVIII:6309311-6333988(-) | 7354  | TGVEG_268780  | 776 kDa  | 3 | NR-44106 |
| putative transmembrane protein                                         | TGVEG_chrIII:1767450-1771629(+)  | 732   | TGVEG_254470  | 80 kDa   | 4 | NR-44106 |
| putative transmembrane protein                                         | TGVEG_chrVIIa:1952069-1956562(-) | 877   | TGVEG_204340  | 97 kDa   | 2 | NR-44106 |
| putative trichohyalin                                                  | TGVEG_chrVI:2228978-2242517(+)   | 3900  | TGVEG_242750  | 445 kDa  | 1 | NR-20731 |
| putative trigger factor protein                                        | TGVEG_chrXI:5987618-5996835(-)   | 1031  | TGVEG_216630  | 113 kDa  | 1 | NR-20730 |
| putative tRNA synthetase                                               | TGVEG_chrXI:6100379-6110788(-)   | 2557  | TGVEG_216500  | 281 kDa  | 1 | NR-20730 |
| putative tryptophan-rich antigen, related protein                      | TGVEG_chrIb:1428720-1432808(+)   | 1362  | TGVEG_209755  | 150 kDa  | 1 | NR-223   |
| putative type I fatty acid synthase                                    | TGVEG_chrIa:1169880-1205921(+)   | 10021 | TGVEG_294820  | 1093 kDa | 2 | NR-44106 |
| putative U2 small nuclear ribonucleoprotein family protein             | TGVEG_chrVIIa:1742756-1751194(-) | 1386  | TGVEG_205010  | 151 kDa  | 2 | NR-20731 |
| putative ubiquinol cytochrome c oxidoreductase                         | TGVEG_chrIV:421333-424813(-)     | 487   | TGVEG_320220  | 55 kDa   | 2 | NR-20731 |
| putative vacuolar ATP synthase subunit b                               | TGVEG_chrXII:608121-610855(+)    | 505   | TGVEG_219800  | 57 kDa   | 1 | NR-223   |
| putative vacuolar protein sorting-associated protein                   | TGVEG_chrIV:2145856-2178740(+)   | 8650  | TGVEG_210700  | 927 kDa  | 2 | NR-20730 |
| putative WDSUB1 family SAM domain protein                              | TGVEG_chrIX:3684919-3696351(-)   | 1912  | TGVEG_290225  | 207 kDa  | 1 | NR-20730 |
| putative zinc finger protein                                           | TGVEG_chrXII:2657218-2662418(+)  | 993   | TGVEG_246160  | 105 kDa  | 2 | NR-20730 |
| putative zinc finger protein                                           | TGVEG_chrIX:4929208-4939468(+)   | 2469  | TGVEG_210300  | 260 kDa  | 2 | NR-20731 |
| PWI domain-containing protein                                          | TGVEG_chrXI:1850551-1854938(+)   | 315   | TGVEG_311160  | 36 kDa   | 1 | NR-223   |
| pyridine nucleotide-disulfide oxidoreductase domain-containing protein | TGVEG_chrIb:152672-160296(-)     | 664   | TGVEG_207620  | 71 kDa   | 2 | NR-20731 |
| pyridine nucleotide-disulfide oxidoreductase domain-containing protein | TGME49_chrIb:155910-163530(-)    | 664   | TGME49_207620 | 71 kDa   | 4 | NR-225   |
| pyruvate dehydrogenase complex subunit PDH-E3II                        | TGVEG_chrVIIa:1003938-1010522(+) | 519   | TGVEG_206470  | 55 kDa   | 3 | NR-223   |
| pyruvate dehydrogenase complex subunit PDH-E3II (PDHE3II)              | TGME49_chrVIIa:947003-953655(+)  | 519   | TGME49_206470 | 55 kDa   | 2 | NR-362   |

|                                                                          |                                  |      |               |         |   |          |
|--------------------------------------------------------------------------|----------------------------------|------|---------------|---------|---|----------|
| pyruvate dehydrogenase E1 component, beta subunit, putative              | TGME49_chrXI:4061396-4065036(+)  | 423  | TGME49_314400 | 46 kDa  | 3 | NR-225   |
| Rab18/RabC-family small GTPase                                           | TGVEG_chrXI:3175019-3178805(+)   | 212  | TGVEG_313190  | 23 kDa  | 4 | NR-20731 |
| Rab6                                                                     | TGME49_chrXI:1368279-1373252(+)  | 209  | TGME49_310460 | 23 kDa  | 2 | NR-225   |
| RAP domain-containing protein                                            | TGVEG_chrX:5641347-5647756(-)    | 1669 | TGVEG_237100  | 182 kDa | 1 | NR-20730 |
| RAP domain-containing protein                                            | TGVEG_chrVIII:1860908-1865683(-) | 1591 | TGVEG_232100  | 176 kDa | 1 | NR-20731 |
| RAP domain-containing protein                                            | TGVEG_chrX:4043396-4062507(-)    | 5107 | TGVEG_211890  | 558 kDa | 1 | NR-223   |
| Ras-related protein Rab11                                                | TGVEG_chrIX:3407739-3411067(-)   | 219  | TGVEG_289680  | 25 kDa  | 2 | NR-20731 |
| RAVE 1 carboxy-terminal protein                                          | TGVEG_chrVIII:512826-536532(-)   | 6665 | TGVEG_230000  | 690 kDa | 2 | NR-44106 |
| RbAp46                                                                   | TGME49_chrXII:3194434-3201814(-) | 665  | TGME49_247250 | 71 kDa  | 1 | NR-362   |
| RecF/RecN/SMC N terminal domain-containing protein                       | TGVEG_chrXI:673381-686571(-)     | 2097 | TGVEG_309400  | 231 kDa | 1 | NR-20730 |
| RecF/RecN/SMC N terminal domain-containing protein                       | TGVEG_chrVIIb:4174404-4191407(-) | 1588 | TGVEG_257180  | 181 kDa | 1 | NR-20731 |
| RED family protein                                                       | TGVEG_chrXII:4459363-4466464(+)  | 586  | TGVEG_249360  | 67 kDa  | 1 | NR-223   |
| RED family protein                                                       | TGME49_chrXII:4484874-4491969(+) | 586  | TGME49_249360 | 67 kDa  | 1 | NR-362   |
| redoxin domain-containing protein                                        | TGVEG_chrV:1708283-1709161(+)    | 292  | TGVEG_286630  | 31 kDa  | 3 | NR-223   |
| regulator of chromosome condensation (RCC1) repeat-containing protein    | TGVEG_chrVI:852264-873025(+)     | 2900 | TGVEG_239700  | 317 kDa | 1 | NR-20730 |
| replication factor-a protein 1 (rpa1) subfamily protein                  | TGVEG_chrX:5189370-5198388(-)    | 914  | TGVEG_236080  | 100 kDa | 1 | NR-20731 |
| rhoptry kinase family protein ROP11 (incomplete catalytic triad)         | TGVEG_chrX:695405-696985(+)      | 526  | TGVEG_227810  | 58 kDa  | 4 | NR-20731 |
| rhoptry kinase family protein ROP24 (incomplete catalytic triad)         | TGVEG_chrIII:515772-517379(+)    | 535  | TGVEG_252360  | 61 kDa  | 3 | NR-44106 |
| rhoptry kinase family protein ROP24 (incomplete catalytic triad) (ROP24) | TGME49_chrIII:512499-514106(+)   | 535  | TGME49_252360 | 61 kDa  | 3 | NR-362   |
| rhoptry kinase family protein ROP26 (incomplete catalytic triad) (ROP26) | TGME49_chrIV:1886967-1888705(-)  | 435  | TGME49_211260 | 48 kDa  | 2 | NR-225   |
| rhoptry kinase family protein ROP34, putative                            | TGME49_chrVI:1057698-1060095(+)  | 553  | TGME49_240090 | 62 kDa  | 4 | NR-225   |
| rhoptry kinase family protein ROP35                                      | TGVEG_chrVIIa:734547-737482(-)   | 603  | TGVEG_304740  | 67 kDa  | 2 | NR-223   |
| rhoptry kinase family protein ROP35 (ROP35)                              | TGME49_chrVIIa:679378-682673(-)  | 640  | TGME49_304740 | 71 kDa  | 1 | NR-225   |
| rhoptry kinase family protein ROP39                                      | TGVEG_chrVIIb:1421262-1423028(+) | 588  | TGVEG_262050  | 65 kDa  | 4 | NR-20731 |

|                                                                          |                                   |      |               |         |    |          |
|--------------------------------------------------------------------------|-----------------------------------|------|---------------|---------|----|----------|
| rhoptry kinase family protein ROP39 (ROP39)                              | TGME49_chrVIIb:1407193-1408959(+) | 588  | TGME49_262050 | 65 kDa  | 2  | NR-225   |
| rhoptry kinase family protein ROP40 (incomplete catalytic triad)         | TGVEG_chrIX:4470853-4473887(+)    | 525  | TGVEG_291960  | 58 kDa  | 4  | NR-20731 |
| rhoptry kinase family protein ROP40 (incomplete catalytic triad) (ROP40) | TGME49_chrIX:4435031-4438065(+)   | 525  | TGME49_291960 | 58 kDa  | 5  | NR-362   |
| rhoptry metalloprotease toxolysin TLN1                                   | TGVEG_chrVIII:5577314-5584090(+)  | 1363 | TGVEG_269885A | 150 kDa | 1  | NR-20731 |
| rhoptry metalloprotease toxolysin TLN1 (TLN1)                            | TGME49_chrVIII:5564529-5572655(+) | 1645 | TGME49_269885 | 182 kDa | 3  | NR-362   |
| rhoptry neck protein RON10                                               | TGVEG_chrVIIb:1561753-1566511(-)  | 834  | TGVEG_261750  | 91 kDa  | 2  | NR-20734 |
| rhoptry neck protein RON2                                                | TGVEG_chrXII:205410-215917(-)     | 1479 | TGVEG_300100  | 166 kDa | 8  | NR-20731 |
| rhoptry neck protein RON2 (RON2)                                         | TGME49_chrXII:214954-225453(-)    | 1479 | TGME49_300100 | 166 kDa | 4  | NR-362   |
| rhoptry neck protein RON3                                                | TGVEG_chrX:3356952-3367628(+)     | 1958 | TGVEG_223920  | 223 kDa | 5  | NR-20731 |
| rhoptry neck protein RON3 (RON3)                                         | TGME49_chrX:3453595-3464270(+)    | 1958 | TGME49_223920 | 223 kDa | 2  | NR-362   |
| rhoptry neck protein RON4                                                | TGVEG_chrVIII:23092-29819(+)      | 984  | TGVEG_229010  | 107 kDa | 4  | NR-20731 |
| rhoptry neck protein RON4 (RON4)                                         | TGME49_chrVIII:20265-27490(+)     | 984  | TGME49_229010 | 107 kDa | 4  | NR-225   |
| rhoptry neck protein RON5                                                | TGVEG_chrXI:2095996-2115723(-)    | 1702 | TGVEG_311470  | 187 kDa | 13 | NR-20731 |
| rhoptry neck protein RON5 (RON5)                                         | TGME49_chrXI:2084486-2104219(-)   | 1702 | TGME49_311470 | 187 kDa | 5  | NR-362   |
| rhoptry neck protein RON6                                                | TGVEG_chrII:2147371-2153156(-)    | 1738 | TGVEG_297960A | 181 kDa | 11 | NR-20730 |
| rhoptry neck protein RON8                                                | TGVEG_chrIX:5817900-5832186(-)    | 2980 | TGVEG_306060  | 329 kDa | 8  | NR-20731 |
| rhoptry neck protein RON8 (RON8)                                         | TGME49_chrIX:5780561-5794847(-)   | 2980 | TGME49_306060 | 329 kDa | 6  | NR-362   |
| rhoptry protein ROP1 (ROP1)                                              | TGME49_chrXI:746156-747496(+)     | 446  | TGME49_309590 | 48 kDa  | 4  | NR-362   |
| rhoptry protein ROP13 (ROP13)                                            | TGME49_chrXI:2555225-2556427(-)   | 400  | TGME49_312270 | 45 kDa  | 2  | NR-225   |
| rhoptry protein ROP15                                                    | TGVEG_chrIV:1874970-1877441(-)    | 333  | TGVEG_211290  | 37 kDa  | 2  | NR-20731 |
| rhoptry protein ROP15 (ROP15)                                            | TGME49_chrIV:1850523-1852993(-)   | 333  | TGME49_211290 | 37 kDa  | 3  | NR-225   |
| rhoptry protein ROP16                                                    | TGVEG_chrVIIb:1062727-1064850(-)  | 707  | TGVEG_262730  | 76 kDa  | 3  | NR-20731 |
| rhoptry protein ROP17                                                    | TGVEG_chrVIIb:3339941-3341767(-)  | 608  | TGVEG_258580  | 69 kDa  | 3  | NR-223   |
| rhoptry protein ROP17 (ROP17)                                            | TGME49_chrVIIb:3321930-3323756(-) | 608  | TGME49_258580 | 69 kDa  | 2  | NR-362   |
| rhoptry protein ROP18 (ROP18)                                            | TGME49_chrVIIa:1513609-1515273(-) | 554  | TGME49_205250 | 63 kDa  | 3  | NR-225   |
| rhoptry protein ROP2A (ROP2A)                                            | TGME49_chrX:7156744-7158043(+)    | 433  | TGME49_215785 | 49 kDa  | 24 | NR-362   |
| rhoptry protein ROP4                                                     | TGVEG_chrla:1422093-1423829(-)    | 365  | TGVEG_295125  | 40 kDa  | 12 | NR-20730 |
| rhoptry protein ROP4 (ROP4)                                              | TGME49_chrla:1413184-1414491(-)   | 382  | TGME49_295125 | 42 kDa  | 15 | NR-362   |
| rhoptry protein ROP5                                                     | KI544629:263-1912(-)              | 549  | TGVEG_308090  | 61 kDa  | 24 | NR-223   |
| rhoptry protein ROP5                                                     | KI544617:439-2088(-)              | 549  | TGVEG_442220  | 61 kDa  | 1  | NR-44106 |
| rhoptry protein ROP5 (ROP5)                                              | TGME49_chrXII:566721-568370(-)    | 549  | TGME49_308090 | 61 kDa  | 15 | NR-362   |
| rhoptry protein ROP7                                                     | KI544658:850-2577(-)              | 575  | TGVEG_295110  | 63 kDa  | 19 | NR-20731 |

|                                   |                                   |     |               |        |    |          |
|-----------------------------------|-----------------------------------|-----|---------------|--------|----|----------|
| rhoptry protein ROP7 (ROP7)       | TGME49_chrla:1408573-1410300(-)   | 575 | TGME49_295110 | 63 kDa | 10 | NR-362   |
| rhoptry protein ROP8              | TGVEG_chrX:7092159-7095102(+)     | 587 | TGVEG_363030  | 67 kDa | 18 | NR-44106 |
| rhoptry protein ROP8 (ROP8)       | TGME49_chrX:7152824-7154551(+)    | 575 | TGME49_215775 | 66 kDa | 16 | NR-362   |
| rhoptry protein ROP9              | TGVEG_chrVI:2823235-2825780(+)    | 353 | TGVEG_243730  | 38 kDa | 6  | NR-20731 |
| rhoptry protein ROP9 (ROP9)       | TGME49_chrVI:2819522-2822066(+)   | 353 | TGME49_243730 | 38 kDa | 3  | NR-225   |
| ribosomal protein RPL10           | TGVEG_chrIX:2744224-2746540(-)    | 221 | TGVEG_288720  | 25 kDa | 3  | NR-20731 |
| ribosomal protein RPL10 (RPL10)   | TGME49_chrIX:2709769-2712080(-)   | 221 | TGME49_288720 | 25 kDa | 1  | NR-362   |
| ribosomal protein RPL11           | TGVEG_chrXI:839101-840722(+)      | 175 | TGVEG_309820  | 20 kDa | 4  | NR-20731 |
| ribosomal protein RPL11 (RPL11)   | TGME49_chrXI:830503-832124(+)     | 175 | TGME49_309820 | 20 kDa | 2  | NR-225   |
| ribosomal protein RPL12           | TGVEG_chrIII:1748320-1751319(-)   | 165 | TGVEG_254440  | 18 kDa | 5  | NR-20731 |
| ribosomal protein RPL13           | TGVEG_chrVIIb:861184-864684(-)    | 355 | TGVEG_263050  | 40 kDa | 1  | NR-44106 |
| ribosomal protein RPL13 (RPL13)   | TGME49_chrVIIb:852681-856181(-)   | 355 | TGME49_263050 | 40 kDa | 1  | NR-225   |
| ribosomal protein RPL13A          | TGVEG_chrIX:4603246-4605948(-)    | 286 | TGVEG_292130  | 33 kDa | 7  | NR-20731 |
| ribosomal protein RPL14           | TGVEG_chrIX:825801-827704(+)      | 157 | TGVEG_267060  | 18 kDa | 4  | NR-20731 |
| ribosomal protein RPL15           | TGVEG_chrX:184932-187162(+)       | 205 | TGVEG_228470  | 24 kDa | 2  | NR-223   |
| ribosomal protein RPL18 (RPL18)   | TGME49_chrXII:290951-294076(+)    | 187 | TGME49_300000 | 21 kDa | 2  | NR-225   |
| ribosomal protein RPL18A          | TGVEG_chrVIIb:1101260-1103370(+)  | 183 | TGVEG_262670  | 21 kDa | 5  | NR-20731 |
| ribosomal protein RPL18A (RPL18A) | TGME49_chrVIIb:1092681-1094792(+) | 183 | TGME49_262670 | 21 kDa | 3  | NR-225   |
| ribosomal protein RPL21           | TGVEG_chrXII:2433527-2434000(+)   | 157 | TGVEG_245680  | 18 kDa | 5  | NR-20731 |
| ribosomal protein RPL23           | TGVEG_chrXI:2430972-2433065(-)    | 139 | TGVEG_312090  | 15 kDa | 4  | NR-20730 |
| ribosomal protein RPL23A          | TGVEG_chrVI:11935-14028(+)        | 167 | TGVEG_238010  | 19 kDa | 3  | NR-20731 |
| ribosomal protein RPL24           | TGVEG_chrXI:6463941-6467606(+)    | 438 | TGVEG_216010  | 48 kDa | 1  | NR-20730 |
| ribosomal protein RPL27A          | TGVEG_chrXI:1394225-1395004(-)    | 147 | TGVEG_310490  | 16 kDa | 2  | NR-20731 |
| ribosomal protein RPL3            | TGVEG_chrX:884432-887124(-)       | 389 | TGVEG_227360  | 44 kDa | 5  | NR-20731 |
| ribosomal protein RPL3 (RPL3)     | TGME49_chrX:993887-996580(-)      | 389 | TGME49_227360 | 44 kDa | 1  | NR-362   |
| ribosomal protein RPL30           | TGVEG_chrVIII:1971022-1972847(-)  | 108 | TGVEG_232230  | 12 kDa | 2  | NR-20730 |
| ribosomal protein RPL31           | TGVEG_chrIX:1349266-1350637(+)    | 120 | TGVEG_266070  | 14 kDa | 5  | NR-20731 |
| ribosomal protein RPL31 (RPL31)   | TGME49_chrIX:1319959-1321330(+)   | 120 | TGME49_266070 | 14 kDa | 3  | NR-225   |
| ribosomal protein RPL32           | TGVEG_chrIX:700307-700812(-)      | 134 | TGVEG_267400  | 16 kDa | 4  | NR-20731 |
| ribosomal protein RPL32 (RPL32)   | TGME49_chrIX:674407-675385(-)     | 134 | TGME49_267400 | 16 kDa | 2  | NR-225   |
| ribosomal protein RPL4            | TGVEG_chrXI:521475-522821(-)      | 448 | TGVEG_309120  | 49 kDa | 5  | NR-20731 |
| ribosomal protein RPL4 (RPL4)     | TGME49_chrXI:514541-515887(-)     | 448 | TGME49_309120 | 49 kDa | 2  | NR-225   |
| ribosomal protein RPL5            | TGVEG_chrIV:549675-552699(+)      | 310 | TGVEG_320050  | 35 kDa | 4  | NR-223   |
| ribosomal protein RPL5 (RPL5)     | TGME49_chrIV:550949-553977(+)     | 310 | TGME49_320050 | 35 kDa | 2  | NR-225   |
| ribosomal protein RPL6            | TGVEG_chrXI:3349802-3350650(+)    | 282 | TGVEG_313390  | 31 kDa | 5  | NR-20731 |
| ribosomal protein RPL7A           | TGVEG_chrVIIb:1668766-1671650(+)  | 276 | TGVEG_261570  | 31 kDa | 4  | NR-20731 |

|                                   |                                   |     |               |        |    |          |
|-----------------------------------|-----------------------------------|-----|---------------|--------|----|----------|
| ribosomal protein RPL7A (RPL7A)   | TGME49_chrVIIb:1652920-1655805(+) | 276 | TGME49_261570 | 31 kDa | 1  | NR-362   |
| ribosomal protein RPL8            | TGVEG_chrVIIa:2129206-2131670(+)  | 260 | TGVEG_204020  | 28 kDa | 3  | NR-20731 |
| ribosomal protein RPL8 (RPL8)     | TGME49_chrVIIa:2046086-2048555(+) | 260 | TGME49_204020 | 28 kDa | 3  | NR-362   |
| ribosomal protein RPL9            | TGVEG_chrV:2666579-2668994(+)     | 190 | TGVEG_284560  | 21 kDa | 1  | NR-20730 |
| ribosomal protein RPL9 (RPL9)     | TGME49_chrV:2713061-2715476(+)    | 190 | TGME49_284560 | 21 kDa | 2  | NR-362   |
| ribosomal protein RPP0            | TGVEG_chrXII:1504617-1506164(+)   | 314 | TGVEG_218410  | 34 kDa | 2  | NR-223   |
| ribosomal protein RPP2            | TGVEG_chrXI:837638-838465(-)      | 113 | TGVEG_309810  | 12 kDa | 3  | NR-223   |
| ribosomal protein RPS11           | TGVEG_chrX:1071610-1074486(-)     | 161 | TGVEG_226970  | 19 kDa | 4  | NR-20731 |
| ribosomal protein RPS13           | TGVEG_chrVIII:5253872-5256132(-)  | 151 | TGVEG_270380  | 17 kDa | 2  | NR-223   |
| ribosomal protein RPS13 (RPS13)   | TGME49_chrVIII:5240753-5243012(-) | 151 | TGME49_270380 | 17 kDa | 2  | NR-225   |
| ribosomal protein RPS14           | TGVEG_chrVIIb:390385-392126(+)    | 156 | TGVEG_263700  | 16 kDa | 6  | NR-20730 |
| ribosomal protein RPS14 (RPS14)   | TGME49_chrVIIb:385908-387618(+)   | 156 | TGME49_263700 | 16 kDa | 4  | NR-225   |
| ribosomal protein RPS15A          | TGVEG_chrX:4308470-4310354(+)     | 231 | TGVEG_234450  | 27 kDa | 2  | NR-20731 |
| ribosomal protein RPS15A (RPS15A) | TGME49_chrX:4397204-4399086(+)    | 231 | TGME49_234450 | 27 kDa | 1  | NR-225   |
| ribosomal protein RPS16           | TGVEG_chrVIIb:865115-866803(+)    | 211 | TGVEG_263040  | 24 kDa | 51 | NR-20731 |
| ribosomal protein RPS16 (RPS16)   | TGME49_chrVIIb:856869-858555(+)   | 211 | TGME49_263040 | 24 kDa | 3  | NR-225   |
| ribosomal protein RPS17           | TGVEG_chrlb:323904-325606(-)      | 132 | TGVEG_207840  | 15 kDa | 2  | NR-20731 |
| ribosomal protein RPS18           | TGVEG_chrX:2440962-2442210(+)     | 156 | TGVEG_225080  | 18 kDa | 5  | NR-20731 |
| ribosomal protein RPS18 (RPS18)   | TGME49_chrX:2540172-2541420(+)    | 156 | TGME49_225080 | 18 kDa | 2  | NR-225   |
| ribosomal protein RPS2            | TGVEG_chrIX:5487008-5489449(+)    | 269 | TGVEG_305520  | 29 kDa | 2  | NR-223   |
| ribosomal protein RPS20           | TGVEG_chrII:1390470-1392308(+)    | 233 | TGVEG_223050  | 26 kDa | 2  | NR-223   |
| ribosomal protein RPS20 (RPS20)   | TGME49_chrII:1385210-1387050(+)   | 233 | TGME49_223050 | 26 kDa | 3  | NR-225   |
| ribosomal protein RPS23           | TGVEG_chrVIII:377860-380758(+)    | 143 | TGVEG_229670  | 16 kDa | 2  | NR-20730 |
| ribosomal protein RPS23 (RPS23)   | TGME49_chrVIII:371876-374724(+)   | 143 | TGME49_229670 | 16 kDa | 3  | NR-225   |
| ribosomal protein RPS24           | TGVEG_chrX:6903940-6905603(-)     | 267 | TGVEG_215460  | 30 kDa | 4  | NR-20731 |
| ribosomal protein RPS25 (RPS25)   | TGME49_chrVIII:1265081-1266106(+) | 161 | TGME49_231140 | 19 kDa | 5  | NR-225   |
| ribosomal protein RPS3            | TGVEG_chrVIII:2004729-2005705(-)  | 255 | TGVEG_232300  | 29 kDa | 4  | NR-44106 |
| ribosomal protein RPS3 (RPS3)     | TGME49_chrVIII:1998615-1999591(-) | 255 | TGME49_232300 | 29 kDa | 3  | NR-362   |
| ribosomal protein RPS3A           | TGVEG_chrVIII:2244287-2245675(+)  | 259 | TGVEG_232710  | 29 kDa | 7  | NR-20731 |
| ribosomal protein RPS3A (RPS3A)   | TGME49_chrVIII:2235909-2237297(+) | 259 | TGME49_232710 | 29 kDa | 4  | NR-225   |
| ribosomal protein RPS4            | TGVEG_chrlb:59395-62533(-)        | 312 | TGVEG_207440  | 36 kDa | 4  | NR-44106 |
| ribosomal protein RPS4 (RPS4)     | TGME49_chrlb:62048-65198(-)       | 312 | TGME49_207440 | 36 kDa | 3  | NR-225   |
| ribosomal protein RPS5            | TGVEG_chrVI:1975486-1976552(-)    | 192 | TGVEG_242330  | 22 kDa | 5  | NR-20731 |
| ribosomal protein RPS5 (RPS5)     | TGME49_chrVI:1972856-1973922(-)   | 192 | TGME49_242330 | 22 kDa | 4  | NR-225   |
| ribosomal protein RPS6            | TGVEG_chrIV:2181703-2182473(+)    | 256 | TGVEG_210690  | 29 kDa | 6  | NR-20731 |
| ribosomal protein RPS6 (RPS6)     | TGME49_chrIV:2156530-2158101(+)   | 256 | TGME49_210690 | 29 kDa | 4  | NR-225   |

|                                                                |                                   |      |               |         |   |          |
|----------------------------------------------------------------|-----------------------------------|------|---------------|---------|---|----------|
| ribosomal protein RPS7                                         | TGVEG_chrVI:476843-477939(+)      | 196  | TGVEG_239100  | 23 kDa  | 3 | NR-20731 |
| ribosomal protein RPS7 (RPS7)                                  | TGME49_chrVI:462430-464737(+)     | 196  | TGME49_239100 | 23 kDa  | 4 | NR-362   |
| ribosomal protein RPS8                                         | TGVEG_chrXII:2252093-2255903(-)   | 205  | TGVEG_245460  | 24 kDa  | 4 | NR-20731 |
| ribosomal protein RPS8 (RPS8)                                  | TGME49_chrXII:2283634-2287444(-)  | 205  | TGME49_245460 | 24 kDa  | 2 | NR-362   |
| ribosomal protein RPS9                                         | TGVEG_chrXII:3855189-3857050(+)   | 188  | TGVEG_248480  | 22 kDa  | 9 | NR-20731 |
| ribosomal protein RPS9 (RPS9)                                  | TGME49_chrXII:3884353-3886214(+)  | 188  | TGME49_248480 | 22 kDa  | 2 | NR-225   |
| ribosomal protein RPSA                                         | TGVEG_chrIX:1354988-1357327(-)    | 287  | TGVEG_266060  | 32 kDa  | 8 | NR-20731 |
| ribosomal protein RPSA (RPSA)                                  | TGME49_chrIX:1325582-1327921(-)   | 287  | TGME49_266060 | 32 kDa  | 1 | NR-362   |
| ribosomal-ubiquitin protein RPL40                              | TGVEG_chrIX:3461937-3463146(+)    | 129  | TGVEG_289750  | 15 kDa  | 8 | NR-223   |
| RIC1 protein                                                   | TGVEG_chrXI:4385053-4399041(-)    | 3789 | TGVEG_314875  | 410 kDa | 1 | NR-20734 |
| RNA methyltransferase, TrmH family protein                     | TGVEG_chrXII:1376143-1390916(+)   | 2898 | TGVEG_218580  | 311 kDa | 1 | NR-20730 |
| RNA polymerase B                                               | tgme49_asubl.1944:20623-23781(+)  | 1052 | TGME49_300660 | 124 kDa | 2 | NR-362   |
| RNA polymerase I specific transcription initiation factor RRN3 | TGVEG_chrVI:295571-310274(+)      | 3150 | TGVEG_238880  | 342 kDa | 2 | NR-20730 |
| RNA pseudouridine synthase superfamily protein                 | TGVEG_chrIX:6284297-6303904(-)    | 6535 | TGVEG_306660  | 676 kDa | 1 | NR-20730 |
| RNA pseudouridine synthase superfamily protein                 | TGME49_chrVIIa:1418022-1420925(+) | 826  | TGME49_205410 | 91 kDa  | 1 | NR-362   |
| RNA recognition motif (A.K.A RRM, RBD, or RNP domain) protein  | TGVEG_chrIII:1966914-1972686(+)   | 781  | TGVEG_254835  | 85 kDa  | 1 | NR-44106 |
| RNA recognition motif-containing protein                       | TGVEG_chrla:1091659-1098102(-)    | 1151 | TGVEG_294710  | 122 kDa | 2 | NR-20731 |
| RNA recognition motif-containing protein                       | TGVEG_chrVIIb:1128077-1130999(+)  | 293  | TGVEG_262620  | 32 kDa  | 6 | NR-20731 |
| RNA recognition motif-containing protein                       | TGVEG_chrIX:1525970-1529022(-)    | 492  | TGVEG_265530  | 51 kDa  | 2 | NR-20731 |
| RNA recognition motif-containing protein                       | TGVEG_chrlb:1781848-1784241(+)    | 475  | TGVEG_321500  | 51 kDa  | 4 | NR-20731 |
| RNA recognition motif-containing protein                       | TGVEG_chrIX:4638421-4650566(-)    | 2070 | TGVEG_292200  | 222 kDa | 1 | NR-20734 |
| RNA recognition motif-containing protein                       | TGVEG_chrX:5335633-5339636(+)     | 513  | TGVEG_236540  | 53 kDa  | 2 | NR-223   |
| RNA recognition motif-containing protein                       | TGVEG_chrIX:4441431-4447191(+)    | 705  | TGVEG_291930  | 73 kDa  | 2 | NR-223   |
| RNA recognition motif-containing protein                       | TGME49_chrla:1083312-1089755(-)   | 1151 | TGME49_294710 | 122 kDa | 1 | NR-225   |
| RNA recognition motif-containing protein                       | TGME49_chrIV:1147010-1150456(+)   | 1148 | TGME49_318690 | 125 kDa | 1 | NR-225   |
| RNA recognition motif-containing protein                       | TGME49_chrIX:2174061-2180163(-)   | 430  | TGME49_264610 | 45 kDa  | 3 | NR-225   |
| RNA recognition motif-containing protein                       | TGME49_chrVIIb:1119507-1122427(+) | 293  | TGME49_262620 | 32 kDa  | 1 | NR-362   |
| RNA recognition motif-containing protein                       | TGVEG_chrVIII:4920912-4928946(-)  | 1374 | TGVEG_270880  | 139 kDa | 1 | NR-44106 |
| RNA-directed DNA polymerase                                    | TGVEG_chrlb:1374727-1392519(-)    | 4625 | TGVEG_209650  | 506 kDa | 2 | NR-20730 |
| RNA-directed DNA polymerase                                    | TGME49_chrlb:1374340-1392166(-)   | 4639 | TGME49_209650 | 508 kDa | 1 | NR-362   |
| RNA-directed RNA polymerase                                    | TGVEG_chrIV:1189938-1199503(+)    | 1252 | TGVEG_318620  | 137 kDa | 1 | NR-20731 |

|                                                          |                                   |      |               |         |    |          |
|----------------------------------------------------------|-----------------------------------|------|---------------|---------|----|----------|
| S15 sporozoite-expressed protein                         | TGVEG_chrXI:5976740-5980172(-)    | 436  | TGVEG_216650  | 49 kDa  | 2  | NR-20731 |
| S15 sporozoite-expressed protein                         | TGME49_chrXI:5983173-5986605(-)   | 436  | TGME49_216650 | 49 kDa  | 2  | NR-225   |
| SAG-related sequence SRS16B (SRS9)                       | TGME49_chrIV:441694-442890(-)     | 398  | TGME49_320190 | 41 kDa  | 1  | NR-362   |
| SAG-related sequence SRS17B                              | TGVEG_chrIV:1012373-1013987(+)    | 379  | TGVEG_319350  | 39 kDa  | 4  | NR-20730 |
| SAG-related sequence SRS17B (SRS17B)                     | TGME49_chrIV:1013186-1015280(+)   | 379  | TGME49_319350 | 39 kDa  | 3  | NR-225   |
| SAG-related sequence SRS20A                              | TGVEG_chrV:2116665-2118561(-)     | 328  | TGVEG_285870  | 35 kDa  | 3  | NR-20730 |
| SAG-related sequence SRS20A (SRS20A)                     | TGME49_chrV:2158758-2160660(-)    | 328  | TGME49_285870 | 35 kDa  | 13 | NR-362   |
| SAG-related sequence SRS29A (SRS1)                       | TGVEG_chrVIII:2669490-2670752(+)  | 420  | TGVEG_233450  | 44 kDa  | 2  | NR-20731 |
| SAG-related sequence SRS29A (SRS1)                       | TGME49_chrVIII:2660930-2662192(+) | 420  | TGME49_233450 | 44 kDa  | 1  | NR-225   |
| SAG-related sequence SRS29B (SAG1)                       | TGVEG_chrVIII:2673014-2674024(+)  | 336  | TGVEG_233460  | 35 kDa  | 18 | NR-223   |
| SAG-related sequence SRS29B (SAG1)                       | TGME49_chrVIII:2664481-2665491(+) | 336  | TGME49_233460 | 35 kDa  | 15 | NR-362   |
| SAG-related sequence SRS29C (SRS2)                       | TGVEG_chrVIII:2679855-2680973(+)  | 372  | TGVEG_233480  | 39 kDa  | 8  | NR-20731 |
| SAG-related sequence SRS29C (SRS2)                       | TGME49_chrVIII:2671322-2672440(+) | 372  | TGME49_233480 | 39 kDa  | 6  | NR-362   |
| SAG-related sequence SRS34A (SAG2A)                      | TGVEG_chrVIII:4770608-4771168(+)  | 186  | TGVEG_271050  | 19 kDa  | 9  | NR-223   |
| SAG-related sequence SRS34A (SAG2A)                      | TGME49_chrVIII:4758133-4758696(+) | 187  | TGME49_271050 | 19 kDa  | 7  | NR-362   |
| SAG-related sequence SRS35A (SRS35A)                     | TGME49_chrVIIa:293019-293537(-)   | 172  | TGME49_280570 | 19 kDa  | 4  | NR-362   |
| SAG-related sequence SRS44 (SRS44)                       | TGME49_chrIX:2135664-2143297(+)   | 2451 | TGME49_264660 | 262 kDa | 10 | NR-362   |
| SAG-related sequence SRS51                               | TGVEG_chrXI:302710-304685(+)      | 472  | TGVEG_308840  | 50 kDa  | 6  | NR-20731 |
| SAG-related sequence SRS52A                              | TGVEG_chrXI:4669621-4671025(+)    | 329  | TGVEG_315320  | 34 kDa  | 3  | NR-20730 |
| SAG-related sequence SRS52A (SRS52A)                     | TGME49_chrXI:4647415-4649068(+)   | 329  | TGME49_315320 | 34 kDa  | 4  | NR-225   |
| SAG-related sequence SRS57 (SAG3)                        | TGME49_chrXII:509133-510290(-)    | 385  | TGME49_308020 | 42 kDa  | 2  | NR-362   |
| sarco/endoplasmic reticulum Ca <sup>2+</sup> -ATPase     | TGVEG_chrVIII:769959-782403(+)    | 1093 | TGVEG_230420  | 119 kDa | 1  | NR-20731 |
| sarco/endoplasmic reticulum Ca <sup>2+</sup> -ATPase     | TGME49_chrVIII:763904-776922(+)   | 1093 | TGME49_230420 | 119 kDa | 1  | NR-225   |
| SCP family extracellular subfamily protein               | TGVEG_chrVI:1004967-1008019(-)    | 246  | TGVEG_239890  | 27 kDa  | 3  | NR-223   |
| Sec7 domain-containing protein                           | TGVEG_chrXI:2587328-2598947(-)    | 3015 | TGVEG_312300  | 325 kDa | 1  | NR-20731 |
| Sec7 domain-containing protein                           | TGME49_chrXI:2575948-2587567(-)   | 3015 | TGME49_312300 | 325 kDa | 1  | NR-225   |
| selenide, water dikinase                                 | TGVEG_chrVIIa:337613-347402(-)    | 1297 | TGVEG_280560  | 138 kDa | 1  | NR-20731 |
| serine/threonine phosphatase PP1                         | TGVEG_chrXI:1536005-1537480(-)    | 306  | TGVEG_310700  | 35 kDa  | 4  | NR-223   |
| serine/threonine phosphatase PP1                         | TGME49_chrXI:1524215-1525690(-)   | 306  | TGME49_310700 | 35 kDa  | 3  | NR-362   |
| serine/threonine specific protein phosphatase            | TGVEG_chrIX:5144684-5159942(-)    | 2883 | TGVEG_304955  | 304 kDa | 1  | NR-223   |
| serine/threonine specific protein phosphatase            | TGME49_chrIX:5107149-5122407(-)   | 2883 | TGME49_304955 | 304 kDa | 1  | NR-362   |
| serine-threonine phosphatase 2C (PP2C)                   | TGVEG_chrVIII:1594045-1597544(+)  | 331  | TGVEG_231850  | 37 kDa  | 1  | NR-223   |
| serpin (serine proteinase inhibitor) superfamily protein | TGVEG_chrXII:2647982-2649762(+)   | 432  | TGVEG_246130  | 47 kDa  | 2  | NR-20734 |



|                                                          |                                   |      |               |         |    |          |
|----------------------------------------------------------|-----------------------------------|------|---------------|---------|----|----------|
| serpin (serine proteinase inhibitor) superfamily protein | TGME49_chrXII:2679539-2681321(+)  | 432  | TGME49_246130 | 47 kDa  | 1  | NR-225   |
| signal peptidase                                         | TGVEG_chrX:5943767-5956362(+)     | 1859 | TGVEG_214090  | 203 kDa | 5  | NR-20734 |
| Sma protein                                              | TGME49_chrXI:5523075-5551762(+)   | 2746 | TGME49_316730 | 307 kDa | 1  | NR-362   |
| small GTPase Rab2, putative                              | TGME49_chrXI:2396761-2401237(+)   | 214  | TGME49_312050 | 24 kDa  | 1  | NR-362   |
| small ubiquitin family modifier, putative                | TGME49_chrIX:1113557-1114435(-)   | 91   | TGME49_266460 | 10 kDa  | 1  | NR-362   |
| Sodium:neurotransmitter symporter family protein         | TGVEG_chrIX:1971222-1974335(+)    | 1037 | TGVEG_264870  | 109 kDa | 1  | NR-20731 |
| Sodium:neurotransmitter symporter family protein         | TGME49_chrIX:1943143-1946393(+)   | 1037 | TGME49_264870 | 109 kDa | 1  | NR-362   |
| Spc97 / Spc98 family protein                             | TGVEG_chrVIIb:507571-517553(-)    | 1877 | TGVEG_263510  | 202 kDa | 1  | NR-223   |
| Spc97 / Spc98 family protein                             | TGME49_chrVIIb:502011-511957(-)   | 1877 | TGME49_263510 | 202 kDa | 1  | NR-362   |
| splicing factor 3b, subunit 3, putative                  | TGME49_chrVIII:1137557-1148655(-) | 1233 | TGME49_230960 | 136 kDa | 2  | NR-225   |
| splicing factor SF2                                      | TGVEG_chrIV:931235-937289(+)      | 450  | TGVEG_319530  | 54 kDa  | 2  | NR-20731 |
| SprT domain-containing protein                           | TGVEG_chrXII:2564724-2570321(+)   | 839  | TGVEG_246020  | 90 kDa  | 1  | NR-44106 |
| START domain-containing protein                          | TGVEG_chrX:5402644-5408338(-)     | 1424 | TGVEG_236660  | 150 kDa | 1  | NR-20734 |
| strictosidine synthase subfamily protein                 | TGVEG_chrIX:3366394-3371850(-)    | 456  | TGVEG_289580  | 49 kDa  | 3  | NR-223   |
| strictosidine synthase subfamily protein                 | TGME49_chrIX:3332822-3338264(-)   | 456  | TGME49_289580 | 49 kDa  | 3  | NR-225   |
| subtilisin SUB1                                          | TGVEG_chrVIIa:2113636-2119609(+)  | 817  | TGVEG_204050  | 87 kDa  | 11 | NR-223   |
| subtilisin SUB1 (SUB1)                                   | TGME49_chrVIIa:2030677-2036482(+) | 761  | TGME49_204050 | 82 kDa  | 2  | NR-362   |
| superoxide dismutase                                     | TGVEG_chrXI:5254360-5256066(-)    | 201  | TGVEG_316310  | 23 kDa  | 3  | NR-223   |
| surface antigen repeat-containing protein                | TGME49_chrV:659732-688284(-)      | 6668 | TGME49_212880 | 762 kDa | 1  | NR-362   |
| sushi domain (scr repeat) domain-containing protein      | TGVEG_chrIV:1885653-1902821(-)    | 3916 | TGVEG_211270  | 415 kDa | 2  | NR-44106 |
| SWI2/SNF2-containing PHD finger protein                  | TGVEG_chrX:5541531-5552059(+)     | 2556 | TGVEG_236970  | 278 kDa | 1  | NR-223   |
| SWI2/SNF2-containing protein                             | TGME49_chrVIII:274876-282945(+)   | 1537 | TGME49_229460 | 167 kDa | 1  | NR-362   |
| SWI2/SNF2-containing protein RAD26                       | TGVEG_chrVIIb:769582-781916(-)    | 1590 | TGVEG_263140  | 175 kDa | 2  | NR-223   |
| SWIRM domain-containing protein                          | TGME49_chrV:1637614-1644989(+)    | 780  | TGME49_286920 | 84 kDa  | 1  | NR-362   |
| sympleskin tight junction carboxy-terminal protein       | TGVEG_chrXII:3224147-3239556(-)   | 1891 | TGVEG_247330  | 204 kDa | 1  | NR-20734 |
| T-complex protein 1 delta subunit                        | TGVEG_chrVIII:3712595-3719822(+)  | 542  | TGVEG_272910  | 59 kDa  | 1  | NR-44106 |
| T-complex protein 1 eta subunit                          | TGVEG_chrII:1840436-1848032(-)    | 546  | TGVEG_297500  | 59 kDa  | 2  | NR-223   |
| tetratricopeptide repeat-containing protein              | TGVEG_chrXII:4542963-4546448(+)   | 1161 | TGVEG_249480  | 126 kDa | 1  | NR-20730 |
| tetratricopeptide repeat-containing protein              | TGVEG_chrVIIb:2510432-2520412(-)  | 3326 | TGVEG_260150  | 353 kDa | 1  | NR-20731 |

|                                                               |                                   |      |               |         |   |          |
|---------------------------------------------------------------|-----------------------------------|------|---------------|---------|---|----------|
| tetratricopeptide repeat-containing protein                   | TGVEG_chrII:1382138-1383895(-)    | 585  | TGVEG_223030  | 63 kDa  | 1 | NR-20731 |
| thioredoxin domain-containing protein                         | TGVEG_chrXII:3244571-3246687(-)   | 312  | TGVEG_247350  | 34 kDa  | 2 | NR-223   |
| thioredoxin domain-containing protein                         | TGVEG_chrVIIa:1838487-1846392(-)  | 659  | TGVEG_204480  | 72 kDa  | 1 | NR-223   |
| threonyl-tRNA synthetase family protein                       | TGVEG_chrXII:113334-117903(+)     | 844  | TGVEG_300260  | 96 kDa  | 3 | NR-20731 |
| toxofilin                                                     | TGME49_chrX:6014213-6014944(+)    | 243  | TGME49_214080 | 27 kDa  | 3 | NR-362   |
| trafficking particle complex subunit 10                       | TGVEG_chrX:764966-781808(+)       | 3648 | TGVEG_227610  | 390 kDa | 2 | NR-44106 |
| transcription elongation factor SPT6 (SPT6)                   | TGME49_chrXI:333208-351035(+)     | 3276 | TGME49_308890 | 366 kDa | 1 | NR-225   |
| transcription factor/nuclear export subunit 2                 | TGVEG_chrVIII:4865629-4885850(-)  | 3000 | TGVEG_270930  | 317 kDa | 7 | NR-44106 |
| translation elongation factor 2 family protein, putative      | TGME49_chrVIIa:1385098-1389126(+) | 952  | TGME49_205470 | 107 kDa | 2 | NR-362   |
| transmembrane protein                                         | TGVEG_chrVI:69801-72276(-)        | 240  | TGVEG_238100  | 27 kDa  | 1 | NR-20731 |
| transporter, major facilitator family protein                 | TGVEG_chrVIII:6714490-6722762(+)  | 2200 | TGVEG_268020B | 240 kDa | 2 | NR-20730 |
| transporter, major facilitator family protein                 | TGME49_chrIII:1105413-1112017(-)  | 1302 | TGME49_253700 | 138 kDa | 2 | NR-225   |
| triose-phosphate isomerase TPI-I                              | TGVEG_chrX:1825371-1827719(+)     | 253  | TGVEG_225930  | 28 kDa  | 1 | NR-223   |
| tRNA nucleotidyltransferase/poly(A) polymerase family protein | TGVEG_chrXI:5025491-5030976(-)    | 1114 | TGVEG_315810  | 122 kDa | 2 | NR-44106 |
| tRNA pseudouridine synthase                                   | TGVEG_chrVIIIb:93973-99994(+)     | 1818 | TGVEG_264190  | 197 kDa | 1 | NR-223   |
| trypsin domain-containing protein                             | TGVEG_chrVIIIb:931079-939834(+)   | 972  | TGVEG_262920  | 105 kDa | 1 | NR-20731 |
| trypsin domain-containing protein                             | TGME49_chrVIIb:922803-931563(+)   | 972  | TGME49_262920 | 105 kDa | 1 | NR-225   |
| tryptophanyl-tRNA synthetase (TrpRS2)                         | TGVEG_chrIX:2509018-2513449(+)    | 689  | TGVEG_288360  | 77 kDa  | 8 | NR-20731 |
| tryptophanyl-tRNA synthetase (TrpRS2)                         | TGME49_chrIX:2473710-2478137(+)   | 689  | TGME49_288360 | 77 kDa  | 4 | NR-362   |
| type I fatty acid synthase, putative                          | TGME49_chrVIIa:1698443-1721297(+) | 5371 | TGME49_204560 | 583 kDa | 1 | NR-362   |
| Tyrosine kinase-like (TKL) protein                            | TGVEG_chrX:1949104-1959650(-)     | 2021 | TGVEG_225770  | 214 kDa | 1 | NR-20730 |
| Tyrosine kinase-like (TKL) protein                            | TGVEG_chrIV:2389530-2405195(+)    | 3571 | TGVEG_301270  | 386 kDa | 2 | NR-20734 |
| UBA/TS-N domain-containing protein                            | TGVEG_chrVIII:1924977-1935599(-)  | 1868 | TGVEG_232180  | 207 kDa | 1 | NR-20731 |
| UBA/TS-N domain-containing protein                            | TGVEG_chrVIII:5152429-5179045(+)  | 7817 | TGVEG_270595  | 846 kDa | 2 | NR-20734 |
| ubiquinol cytochrome c oxidoreductase, putative               | TGME49_chrIV:427353-430830(-)     | 487  | TGME49_320220 | 55 kDa  | 1 | NR-362   |
| ubiquitin carboxyl-terminal hydrolase                         | TGVEG_chrIV:2091226-2102607(+)    | 3600 | TGVEG_210781  | 372 kDa | 1 | NR-223   |
| ubiquitin interaction motif family protein                    | TGVEG_chrX:3328173-3332330(-)     | 388  | TGVEG_223960  | 41 kDa  | 2 | NR-20731 |

|                                                                 |                                   |      |               |         |    |          |
|-----------------------------------------------------------------|-----------------------------------|------|---------------|---------|----|----------|
| ubiquitin-activating enzyme E1 family protein                   | TGME49_chrIX:3681333-3691332(+)   | 1092 | TGME49_290290 | 120 kDa | 1  | NR-362   |
| unspecified product (MAG1)                                      | TGME49_chrVIII:5311766-5313737(+) | 452  | TGME49_270240 | 49 kDa  | 11 | NR-362   |
| variable surface lipoprotein                                    | TGVEG_chrIX:6070901-6080800(+)    | 876  | TGVEG_306350  | 90 kDa  | 2  | NR-44106 |
| Vps53 family, N-terminal protein                                | TGVEG_chrII:1639630-1645745(+)    | 1029 | TGVEG_297230  | 110 kDa | 2  | NR-20734 |
| V-type H(+)-translocating pyrophosphatase VP1                   | TGME49_chrXII:4073180-4078137(+)  | 816  | TGME49_248670 | 85 kDa  | 2  | NR-225   |
| WD domain, G-beta repeat-containing protein                     | TGVEG_chrXII:904401-913022(+)     | 2649 | TGVEG_219450  | 282 kDa | 3  | NR-20730 |
| WD domain, G-beta repeat-containing protein                     | TGVEG_chrXI:4534249-4540966(-)    | 1462 | TGVEG_315140  | 155 kDa | 2  | NR-20731 |
| WD domain, G-beta repeat-containing protein                     | TGVEG_chrXI:1262793-1265027(-)    | 744  | TGVEG_310310  | 76 kDa  | 3  | NR-20731 |
| WD domain, G-beta repeat-containing protein                     | TGVEG_chrVIII:4201688-4211586(+)  | 2869 | TGVEG_272040  | 305 kDa | 17 | NR-20734 |
| WD domain, G-beta repeat-containing protein                     | TGVEG_chrVIII:3254186-3267835(+)  | 3633 | TGVEG_273800  | 381 kDa | 1  | NR-20734 |
| WD domain, G-beta repeat-containing protein                     | TGME49_chrIV:902674-910550(+)     | 690  | TGME49_319570 | 76 kDa  | 1  | NR-225   |
| WD domain, G-beta repeat-containing protein                     | TGME49_chrXI:1658762-1668393(-)   | 3142 | TGME49_310910 | 339 kDa | 1  | NR-362   |
| WLM domain protein                                              | TGVEG_chrVI:3437149-3444130(+)    | 1333 | TGVEG_244660  | 144 kDa | 1  | NR-20730 |
| zinc carboxypeptidase superfamily protein                       | TGVEG_chrVIII:4327039-4337408(-)  | 1330 | TGVEG_271870  | 144 kDa | 1  | NR-20730 |
| zinc finger (CCCH type) motif-containing protein                | TGVEG_chrXII:3741838-3744601(+)   | 816  | TGVEG_248270  | 87 kDa  | 1  | NR-20731 |
| zinc finger (CCCH type) motif-containing protein                | TGVEG_chrXII:1096005-1100731(+)   | 1086 | TGVEG_219120  | 116 kDa | 1  | NR-223   |
| zinc finger (CCCH type) motif-containing protein                | TGME49_chrX:2915917-2922188(-)    | 1934 | TGME49_224630 | 209 kDa | 1  | NR-362   |
| zinc finger (CCCH type) motif-containing protein                | TGME49_chrVI:1886589-1889819(+)   | 852  | TGME49_242090 | 90 kDa  | 2  | NR-362   |
| zinc finger in N-recognin protein                               | TGME49_chrVIIa:2575185-2600200(-) | 5356 | TGME49_203320 | 573 kDa | 1  | NR-362   |
| zinc finger, C3HC4 type (RING finger) domain-containing protein | TGVEG_chrX:3392007-3412994(-)     | 3893 | TGVEG_223880  | 407 kDa | 2  | NR-20734 |
| zinc finger, C3HC4 type (RING finger) domain-containing protein | TGME49_chrX:7061903-7068481(-)    | 1471 | TGME49_215640 | 160 kDa | 1  | NR-225   |

|                                                                    |                                |      |               |         |   |          |
|--------------------------------------------------------------------|--------------------------------|------|---------------|---------|---|----------|
| zinc finger, C3HC4 type (RING finger)<br>domain-containing protein | TGME49_chrX:3488612-3509562(-) | 3893 | TGME49_223880 | 407 kDa | 1 | NR-362   |
| zinc finger, C3HC4 type (RING finger)<br>protein                   | TGVEG_chrXI:3680019-3689833(-) | 1588 | TGVEG_313760  | 170 kDa | 1 | NR-44106 |
